1

Aug 31<sup>st</sup>, 2021

2

3 **Intra-helical salt bridge contribution to membrane**  
4 **protein insertion**

5

6 Gerard Duart <sup>1#</sup>, John Lamb <sup>2#</sup>, Juan Ortiz-Mateu <sup>1</sup>, Arne Elofsson <sup>2\*</sup> and Ismael  
7 Mingarro <sup>1\*</sup>

8

9 <sup>1</sup> Departament de Bioquímica i Biologia Molecular, Institut Universitari de  
10 Biotecnologia i Biomedicina (BioTecMed), Universitat de València. E-46100  
11 Burjassot, Spain.

12 <sup>2</sup> Science for Life Laboratory and Department of Biochemistry and biophysics,  
13 Stockholm University, 171 21 Solna, Sweden

14

15

16 # Equal contribution

17 \* Corresponding authors

18

19

20 **ABSTRACT**

21 Salt bridges between negatively (D, E) and positively charged (K, R, H) amino acids  
22 play an important role in protein stabilization. This has a more prevalent effect in  
23 membrane proteins where polar amino acids are exposed to a very hydrophobic  
24 environment. In transmembrane (TM) helices the presence of charged residues can  
25 hinder the insertion of the helices into the membrane. This can sometimes be  
26 avoided by TM region rearrangements after insertion, but it is also possible that the  
27 formation of salt bridges could decrease the cost of membrane integration.  
28 However, the presence of intra-helical salt bridges in TM domains and their effect  
29 on insertion has not been properly studied yet. In this work, we use an analytical  
30 pipeline to study the prevalence of charged pairs of amino acid residues in TM  $\alpha$ -  
31 helices, which shows that potentially salt-bridge forming pairs are statistically over-  
32 represented. We then selected some candidates to experimentally determine the  
33 contribution of these electrostatic interactions to the translocon-assisted  
34 membrane insertion process. Using both *in vitro* and *in vivo* systems, we confirm  
35 the presence of intra-helical salt bridges in TM segments during biogenesis and  
36 determined that they contribute between 0.5-0.7 kcal/mol to the apparent free  
37 energy of membrane insertion ( $\Delta G_{app}$ ). Our observations suggest that salt bridge  
38 interactions can be stabilized during translocon-mediated insertion and thus could  
39 be relevant to consider for the future development of membrane protein prediction  
40 software.

41 **KEYWORDS**

42 electrostatic interactions; membrane insertion; salt bridge; translocon;  
43 transmembrane helix;

## 45 INTRODUCTION

46 Most integral membrane proteins have to insert their transmembrane (TM)  
47 segments into the lipid bilayer in a helical conformation and then acquire a defined  
48 three-dimensional structure by packaging their helices (Martínez-Gil et al., 2011).  $\alpha$ -  
49 Helical TM segments are largely composed of apolar residues because of the  
50 hydrophobic nature of the membrane environment. Nevertheless, in some cases, it  
51 is necessary for the protein activity to include polar amino acids in a TM region in  
52 order to develop a functional or structural role (Baeza-Delgado et al., 2012). This  
53 fact is sometimes not contemplated in modern membrane topology prediction tools  
54 (Tsirigos et al., 2018; 2015), in which the presence of charged amino acids in a  
55 sequence automatically suppose a penalty increase in the predicted free energy  
56 ( $\Delta G_{\text{pred}}$ ) of insertion. The presence of polar amino acids in TM regions is more  
57 frequent than what would be expected (Bañó-Polo et al., 2012), especially when  
58 these are in pairs on the same face of an  $\alpha$ -helix.

59 Salt bridges are electrostatic interactions between negatively (D, E) and  
60 positively charged (K, R, H) amino acids that play an important role in protein  
61 stabilization (Marqusee and Baldwin, 1987). Many studies have shown that pairs of  
62 charged residues that form potential salt-bridges stabilize soluble  $\alpha$ -helices (Donald  
63 et al., 2011). Salt bridges play an important role in the folding of globular proteins  
64 and, despite their low occurrence in TM domains, it seems that the contribution in  
65 membrane protein stability could be even more determinant. This contribution is  
66 especially important in membrane protein biogenesis, as salt bridges help to bury  
67 the polarity of charged residues in a hydrophobic environment (Mbaye et al., 2019).  
68 Apart from that, it has been suggested that potential salt bridges could help in the

69 insertion of TM  $\alpha$ -helices (Baeza-Delgado et al., 2016; Bañó-Polo et al., 2012), even  
70 though their predicted  $\Delta G$  penalty is well above what is usually seen for TM  
71 segments.

72 To investigate the potential formation of intra-helical salt bridges in TM  $\alpha$ -  
73 helices, we analyzed the composition of the TM domains from membrane proteins  
74 of known structures looking for preferences in the pairing of charged amino acids.  
75 This analysis showed that charged residue pairing is more prevalent than expected  
76 for pairs located on the same face of  $\alpha$ -helices within membranes. Likely, salt bridge  
77 formation on the same face of  $\alpha$ -helices reduces the unfavorable energetics of  
78 inserting ionizable residues into the hydrophobic membrane core (Chin and Heijne,  
79 2000). We use this knowledge together with the known membrane protein  
80 structures to generate a list of potential candidates for further *in vitro* and *in vivo*  
81 experiments.

82 In this work, we have studied the presence of intra-helical salt bridges in TM  
83 domains using *in silico*, *in vitro* and *in vivo* systems, showing that despite this being  
84 an unexpected phenomenon in nature, salt bridges can be crucial for membrane  
85 insertion. Also, we determined in a quantitative manner that the apparent free  
86 energy ( $\Delta G_{app}$ ) of membrane insertion through the translocon machinery can be  
87 decreased between 0.5-0.7 kcal/mol by position-specific charge pair interaction,  
88 which is not contemplated in the commonly used  $\Delta G$  predictors. These findings will  
89 lead to a better understanding of the insertion mechanism of TM helices and to  
90 improve prediction tools that would more accurately be able to model the presence  
91 of charged residues in these helices.

92

## 93 **RESULTS**

### 94 **Charge pair interactions in model transmembrane helices.**

95 To test the contribution of potential salt bridges to the translocon-mediated  
96 membrane insertion, we used the vehicle protein leader peptidase (Lep) from  
97 *Escherichia coli* (Fig.1a). The Lep protein consists of two TM segments (H1 and H2)  
98 connected by a cytoplasmic loop (P1) and a large C-terminal (P2) domain, which  
99 inserts into endoplasmic reticulum (ER)-derived rough microsomes with both  
100 termini located in the microsomes lumen. The designed TM segments were inserted  
101 into the luminal P2 domain and flanked by two acceptor sites (G1 and G2) for N-  
102 linked glycosylation. Glycosylation occurs exclusively in the lumen of the ER (or  
103 microsomes) because of the location of the oligosaccharyltransferase (OST) active  
104 site (a translocon-associated enzyme responsible for the oligosaccharide transfer)  
105 (Braunger et al., 2018). In this case, the engineered glycosylation sites can be used  
106 as membrane insertion reporters because G1 will always be glycosylated due to its  
107 native luminal localization, but G2 will be glycosylated only upon translocation of  
108 the analyzed sequence across the microsomal membrane. A singly glycosylated  
109 construct in which a tested sequence is inserted into the membrane has a molecular  
110 mass ~2.5 kDa higher than the molecular mass of Lep molecule expressed in the  
111 absence of microsomes; the molecular mass shifts by ~5 kDa upon double  
112 glycosylation, which facilitates its identification by gel electrophoresis when  
113 expressed in the presence of [<sup>35</sup>S-labeled] amino acids. Then, *in vitro*  
114 transcription/translation of these chimeric proteins in the presence of rough  
115 microsomal membranes (RMs) allows for accurate and quantitative description of  
116 membrane insertion of designed sequences (Bañó-Polo et al., 2019; Hessa et al.,

117 2005; 2007; Tamborero et al., 2011). The degree of membrane insertion is quantified  
118 by analyzing the fractions of singly glycosylated (i.e., membrane inserted) and  
119 doubly glycosylated (i.e., non-inserted) molecules, which can be expressed as an  
120 experimental apparent free energy of membrane insertion,  $\Delta G_{\text{exp}}$  (see Materials and  
121 Methods) (Hessa et al., 2005).

122 We first compared the effects of oppositely charged Lys and Asp residues  
123 on the insertion of a 19-residue-long hydrophobic stretch (L4/A15 scaffold, 4  
124 leucines and 15 alanines), which was designed to insert stably into the RM  
125 membranes (Hessa et al., 2005), including charges centered in the TM segment at  
126 different positions (Fig. 1b) and “insulated” from the surrounding sequence by N-  
127 and C-terminal GGPG- and -GPGG tetrapeptides. Single Lys and Asp residues  
128 were placed in positions 8 and 12 respectively, and pairs of Lys-Asp residues were  
129 designed to cover positions 7-12 (that is, more than one helical turn). When pairs of  
130 charged residues are present, our results showed a tendency to insert more  
131 efficiently when pair charges were placed in positions ( $i, i+1; i, i+3; i, i+4$ ) that are  
132 permissive with salt bridge formation (Fig. 1c), actually an effect not observed in the  
133 predictions (Fig. 1b). Similar results were obtained on a different Leu/Ala  
134 background with a slightly higher insertion efficiency (L5/A14, 5 leucines and 14  
135 alanines), those mutants harbouring charged pairs compatible with salt bridge  
136 formation (i.e.  $i, i+3; i, i+4$ ) insert more efficiently than the non-compatible one  $i, i+5$   
137 (Figure S1). Being the insertion of charged residues a thermodynamically  
138 inconvenient phenomenon within the membrane environment, it is expected that  
139 the sequence context and the amino acid composition of the TM helix would be  
140 determinant for salt bridge formation. Accordingly, we scrutinized a large dataset of

141 membrane proteins of known three-dimensional structures in order to focus on  
142 natural salt bridges present within TM segments.

143

#### 144 **Charged pairs in transmembrane helices.**

145 Alpha helices are a common secondary structure in both globular and membrane  
146 proteins. We created two main datasets, TM dataset with helical membrane  
147 proteins of known structure from the PDBTM-dataset (Kozma et al., 2013), and  
148 GLOB dataset with globular alpha helical proteins selected from the SCOP-  
149 database (Andreeva et al., 2013; 2019), see methods for the full creation steps.  
150 Table 1 shows a breakdown of alpha-helices, charged residues and salt bridges in  
151 the two datasets. What is clear is that long alpha helices ( $\geq 17$  residues) form a  
152 larger proportion in the TM dataset than in the globular helices (GLOB) dataset,  
153 which is logical as most TM helices need to span through the hydrophobic core of  
154 the lipid bilayer of thickness  $\sim 30$  Å.

155 Our TM dataset showed the same distribution of polar charges as previous  
156 studies (Illergård et al., 2011), with about 10 % of polar residues in the core  
157 membrane regions (see Table 1), and about one-third of these are charged. Over  
158 half of the charged residues could form pairs with other charged residues at  
159 intervals of  $i, i+1$ ;  $i, i+3$  and  $i, i+4$ . In contrast, the GLOB dataset had a much higher  
160 proportion of charged polar residues. The GLOB dataset also contained about 15  
161 times as many charged pairs relative to its size compared to the TM dataset, again  
162 indicating that charged residues are more common in globular than in TM helices.

163 The two datasets, TM and GLOB, were extended with homologous  
164 sequences identified by searching with jackhammer against UniProt. All sequences

165 with an E-value lower than  $10^{-3}$  were included. These datasets are named TM-MSA  
166 and GLOB-MSA. Using data in the TM-MSA dataset to produce the log odds ratios,  
167 we identified periodicity patterns of charged residue pairs that are more common  
168 than what would have been expected from the underlying amino acid composition  
169 (see Figure 2). We found that polar residues at pairs  $i, i+3$ ;  $i, i+4$  and  $i, i+7$  are  
170 significantly enhanced (Fig. 2). This feature is strengthened when we examine the  
171 same plot for the GLOB-MSA dataset, where these patterns were not observed  
172 (Figure S2). This was also clear when statistical significance was taken into account,  
173 see Figures S3 and S4.

174 Table 2 lists the log odds ratios together with errors and familywise error-  
175 corrected  $p$ -values for all pairs at separation up to seven residues. It is clear that  
176 pair residues placed at  $i, i+1$ ;  $i, i+3$  and  $i, i+4$  positions are most significant,  
177 especially in the case of oppositely charged pairs.

178

### 179 **Structural analysis of charged residues in transmembrane helices.**

180 The abundance of salt bridges also shows a remarkable difference between TM and  
181 globular proteins. In the GLOB dataset over 13% of the proteins contains at least  
182 one local salt bridge in an alpha helix whereas just over 5% of the membrane  
183 proteins contains a local salt bridge, see Table 1. This does conform to our current  
184 understanding of soluble versus TM alpha-helices and their different environments,  
185 and suggests that salt bridges in TM regions perform a vital functional and/or  
186 structural role.

187 As seen in Figure 2, charged pairs of amino acids are especially prevalent at  
188 positions  $i, i+1$ ;  $i, i+3$  and  $i, i+4$ . Oppositely charged residues stand out, especially



189 Glu-Arg at  $i, i+1$ , Glu-Lys at  $i, i+3$  and Asp-Lys at  $i, i+4$ . Also, several same charged  
190 pairings at  $i, i+3$  and  $i, i+6$  are more frequent than expected. Other known structural  
191 features can also be hinted at, including aromatic ring stacking by His-Trp pair  
192 (Samanta et al., 1999) at  $i, i+6$ , and contacting with prosthetic groups by His-His  
193 pair at  $i, i+7$  (Illergård et al., 2011).

194 Charged pairs placed at  $i, i+1$ ;  $i, i+3$  and  $i, i+4$  could potentially form salt  
195 bridges as they are all on the same relative face of the alpha helix and are close  
196 enough in vertical separation on the helix (see Figure 3, top). Although oppositely  
197 charged pairs at  $i, i+7$  are also on the same face of the alpha helix, unless the alpha  
198 helix has a bend, both residues are too far separated to form a salt bridge. This was  
199 clearly seen in Figure 3 where the TM dataset was used. In both absolute count and  
200 log odds ratios (Fig. 3a) it is clear that residues at  $i, i+1$ ;  $i, i+3$  and  $i, i+4$  are by far  
201 the most common and overrepresented pairings. Figure 3a also shows that  
202 oppositely and same charged pairs have about the same overrepresentation at  $i,$   
203  $i+3$ , whereas oppositely charged pairs are stronger than same charged pairs at  $i,$   
204  $i+1$  and  $i, i+4$ , both within salt bridge range, and same charged pairs are stronger at  
205 positions  $i, i+7$  and  $i, i+8$ , too far to form salt bridges.

206 When structure-observed salt bridges in the different positions were  
207 compared to the oppositely charged pairs a clear image aroused, see Figure 3b.  
208 Even though there are more oppositely charged pairs at position  $i, i+1$  than in  
209 positions  $i, i+3$  and  $i, i+4$  with both log odds ratios over 1.0 (Fig. 3a), only about 15%  
210 of the oppositely charged pairs at  $i, i+1$  form salt bridge (Fig. 3b). This is in contrast  
211 to  $i, i+3$  where almost 40 % of the pairs form salt bridges, and just under 25% at  $i,$   
212  $i+4$  (Fig. 3b).

213

214 **Selection of natural salt bridges from membrane protein structures.**

215 To further look for candidate proteins containing membrane-spanning helices with  
216 salt bridges we started with the redundant (TM-Red) dataset of known structures  
217 (see Materials and Methods). Each of the 8,687 proteins in our dataset were  
218 scanned for oppositely charged pairs in positions  $i, i+1$ ;  $i, i+3$  and  $i, i+4$  within any  
219 TM segments core region. For each of these, we only kept proteins with at least one  
220 TM segment that contains such a pair and where this pair was within salt bridging  
221 distance.

222 To select for potential candidates, we also look at the estimated  $\Delta G_{\text{pred}}$   
223 values and choose helices with a positive value above one, as per our hypothesis,  
224 a salt bridge helps TM insertion of sequences for which the hydrophobic force  
225 would not be enough to insert. This stricter definition results in a set of 426  
226 candidates of a total of 431 salt bridges with a wide range of estimated  $\Delta G_{\text{pred}}$   
227 penalty values (Figure S5). As shown in Figure S5, most TM segments with a salt  
228 bridge exhibit a surprisingly high  $\Delta G_{\text{pred}}$  value above 0 that in normal circumstances  
229 are not expected to insert into a membrane. Then, we selected TM7 (helix G) from  
230 halorhodopsin protein (PDB ID: 3QBG) with an estimated  $\Delta G_{\text{pred}}$  value above +1.7  
231 kcal/mol, and helix A from calcium ATPase (PDB ID: 1SU4) with a higher estimated  
232  $\Delta G_{\text{pred}}$  value (above +4.1 kcal/mol), as candidates for systematic studies to cover a  
233 wide range of insertion penalties. See the github repository  
234 ([https://github.com/ElofssonLab/salt\\_bridges](https://github.com/ElofssonLab/salt_bridges)) for the full lists.

235

236 **Intra-helical salt bridge stabilizes the insertion of helix G from halorhodopsin.**

237 Halorhodopsin (hR) from *Natronomonas pharaonis* (3QBG) is a protein made up of  
238 seven TM helices (helix A through G) and a retinal chromophore that is bound via a  
239 protonated Schiff base to the  $\epsilon$ -amino group of a lysine (K258) residue located  
240 roughly in the middle of helix G (Kanada et al., 2011). *In silico* analysis of 3QBG  
241 structure, the anion-free form of the protein, showed a charged pair of amino acids  
242 (Asp-Lys), involving the functional K258 and the D254 in the center of helix G (Fig.  
243 4). The position ( $i, i+4$ ) and the distance between the anionic carboxylate ( $\text{RCOO}^-$ )  
244 from the Asp residue and the cationic ammonium ( $\text{RNH}_3^+$ ) from the lysine residue,  
245 in the crystal structure, was about 3.5 Å, a permissive distance for a salt bridge  
246 formation (Fig. 4g), which has been established as being lower than 4 Å (Kumar and  
247 Nussinov, 2002). To get insights into this interaction, we designed three mutants  
248 that were supposed to perturb the salt bridge interaction by different ways: K258D  
249 mutant by placing two charged residues with the same polarity at positions  $i, i+4$ ;  
250 K258A mutant by replacing one of the charged residues by a non-polar amino acid,  
251 and K258Y/Y259K double mutant by placing the charged pair at a non-permissive  
252 salt bridge position ( $i, i+5$ ; Fig. 4g), while keeping the same amino acid composition  
253 (Fig. 4a).

254 Halorhodopsin is a trimeric protein in which the helix G is neither exposed at  
255 the monomer-monomer interface nor oriented to the inner part of the trimeric  
256 structure (Fig. 4, panels b-d). In fact, the charged pair found in helix G is oriented  
257 toward the core of the 'globular' structure in each monomer. Then, the insertion of  
258 helix G was studied using the Lep-based assay. When constructs harboring helix G  
259 wild type sequence were translated *in vitro* in the presence of RMs singly-  
260 glycosylated (reporting insertion) forms were found (Fig. 4e, lane 2), despite its

261 positive (suggesting non-insertion)  $\Delta G_{\text{pred}}$  value (Fig. 4a). The nature of the higher  
262 molecular weight polypeptide species was analysed by endoglycosidase H (EndoH)  
263 treatment, a highly specific enzyme that cleaves N-linked oligosaccharides.  
264 Treatment with EndoH of the samples eliminated higher molecular mass bands (Fig.  
265 4E, lane 1), confirming the sugar source of the retarded electrophoretic mobility  
266 bands and suggesting helix G insertion into the microsomal membrane. However,  
267 locating the Asp-Lys pair at  $i, i+5$ , which is non-compatible with salt bridge  
268 interaction (Fig. 4g), strongly reduced the experimental insertion efficiency (Fig. 4e,  
269 lane 5). Interestingly, replacing the positively charged lysine residue by a negatively  
270 charged aspartic acid residue (K258D) rendered similarly low levels of insertion  
271 efficiency (Fig. 4e, lane 4). As expected, replacement of the ionizable lysine residue  
272 by the aliphatic alanine increased the insertion efficiency (Fig. 4e, lane 3). In this  
273 later mutant, the most likely cause for the increased insertion is the absence of the  
274 positively charged lysine amino side chain and by the presence of the methyl side  
275 chain group of the mutant alanine residue. The results of the Lep-based  
276 glycosylation assay indicated that wild type (wt) and DA sequences (two stabilized  
277 charges or only one charge, respectively) are inserted properly into the microsomal  
278 membrane ( $\Delta G_{\text{exp}}$  values -0.24 and -0.88 kcal/mol, respectively), but when the salt  
279 bridge is disrupted, either by having two charged amino acids with the same polarity  
280 (DD) or by placing oppositely charged residues at a non-permissive distance ( $i, i+5$ )  
281 in the center of the helix, the translocation of the segment increases substantially.  
282 It should be mentioned that the K258Y/Y259K double mutant has the same amino  
283 acid composition than the original helix G, but insertion efficiency is remarkably  
284 decreased ( $\Delta G_{\text{exp}} = +0.31$  kcal/mol). Together these results show that the interaction

285 (salt bridge) between Asp and Lys residues in the center of the helix G from 3QBG  
286 is essential for its proper insertion into the microsomal membrane. The salt bridge  
287 contributes approximately ~0,5 kcal/mol to the apparent experimental free energy  
288 of microsomal membrane insertion, as this is the difference found between the  
289  $\Delta G_{\text{exp}}$  values for the wt and *i, i+5* mutant.

290 Next, to ensure that the *in vitro* results are relevant to the *in vivo* situation, wt  
291 and *i, i+5* constructs were also expressed *in vivo* in HEK-293T cells. To this end, a  
292 c-myc tag was engineered at the C-terminus of the Lep chimera to allow immune-  
293 detection of our constructs in cell extracts. As shown in Fig. 4f, transfected cells  
294 with the chimera containing helix G wt sequence rendered singly glycosylated  
295 molecules, indicating *in vivo* membrane insertion. In contrast, cells transfected with  
296 the construct harboring *i, i+5* sequence rendered almost exclusively doubly  
297 glycosylated forms, as proved by EndoH treatment (Fig. 4f, lane 2), suggesting  
298 membrane translocation. These results emphasized the relevance of salt bridge  
299 interactions in translocon-mediated TM insertion, especially in the *in vivo* (cellular)  
300 environment.

301

### 302 **Salt bridge contribution to the insertion of a heavily charged helix.**

303 In order to challenge salt bridge interactions in a more hydrophilic TM helix (Figure  
304 S5), we focus on helix A from the sarcoplasmic/ER calcium ATPase 1 (Toyoshima  
305 et al., 2000). Calcium ATPase (PDB ID: 1SU4, *Oryctolagus cuniculus*) is a member  
306 of the P-type ATPases that transport ions across the membrane against a  
307 concentration gradient involving 10  $\alpha$ -helices (helix A through J) in the membrane-  
308 embedded region (Toyoshima et al., 2000). *In silico* analysis of 1SU4 structure, the

309 crystal structure of the calcium ATPase with two bound calcium ions, showed Asp-  
310 Arg (DR) pair (D59 and R63) in the center of the helix A. This helix extends beyond  
311 the membrane (Fig. 5a, from Leu49 to Phe78) and shows some particularities. On  
312 the one hand, in the structure the membrane-embedded stretch (the N-terminal  
313 region of helix A) encompasses from Leu49 to Ala69 residues, and includes several  
314 charged amino acids, probably involved in the Ca<sup>2+</sup> transport across the membrane  
315 (Glu51, Glu55, Glu58, Asp59 and Arg63). Therefore, the  $\Delta G_{\text{pred}}$  value for this  
316 segment (L49-A69) is remarkably higher (and positive, +4.12 kcal/mol) than  
317 expected for a TM helix (Fig. 5b). On the other hand, the C-terminal region of this  
318 helix contains a high prevalence of non-polar amino acids that is more compatible  
319 with the hydrophobicity of the membrane core. Nevertheless, the presence of the  
320 functional amino acids (e.g. Glu58) in the membrane-embedded region reinforce  
321 the idea that the more hydrophilic N-terminal region must ultimately be embedded  
322 within the membrane (Toyoshima et al., 2000). It has been previously shown that  
323 the position in the membrane of TM helices in protein folded structures does not  
324 always correspond to the thermodynamically favored positions in the membrane of  
325 the isolated helices (Kauko et al., 2010). Instead, after translocon-mediated insertion  
326 of the more hydrophobic region, repositioning of TM helices relative to the lipid  
327 bilayer provides a convenient way for non-hydrophobic polypeptide segments to  
328 become buried within the membrane. Then, the nature of helix A suggested the  
329 possibility that initial insertion of the hydrophobic region can be followed by  
330 subsequent repositioning of the charged region into the membrane hydrophobic  
331 core, which will be the final segment embedded in the lipid bilayer (Fig. 5a).  
332 Interestingly, the  $\Delta G$  Predictor server (<https://dgpred.cbr.su.se/index.php?p=home>)

333 selected the adjacent (C-terminus, L60-F78) hydrophobic region as TM (Fig. 5b),  
334 instead of the charged region found at the high-resolution structure (Uniprot code:  
335 P04191).

336 Focusing on the potential salt bridge residues (D59 and R63 pair), the  
337 distance between the anionic carboxylate ( $\text{RCOO}^-$ ) from the D59 and the cationic  
338 guanidinium ( $\text{RC}(\text{NH}_2)_2^+$ ) from the R63 was about 3.0 Å in the crystal structure  
339 (Figure 5a), clearly within the permissive range for salt bridge formation. To  
340 investigate the contribution of this potential salt bridge interaction in the translocon-  
341 mediated membrane insertion of this region, we worked with two different scaffold  
342 sequences: the full helix A involving the residues 49-78 (Long, L); and a shorter  
343 membrane-embedded version including residues 49-69 (Short, S) as found in the  
344 solved structure. We also challenged the D59-R63 charge pair interaction in both  
345 sequences by increasing the separation between the ionizable residues from the  
346 native  $i, i+4$  to non-permissive  $i, i+5$ , while maintaining amino acid composition  
347 (R63I/I64R double mutant). *In vitro* transcription/translation of these sequences in  
348 the presence of microsomes rendered singly glycosylated molecules for the  
349 construct containing full-length helix A (Fig. 5c, lane 2). In contrast, when only the  
350 membrane-embedded sequence was included, the Lep chimera was mainly doubly  
351 glycosylated (Fig. 5c, lane 3), suggesting that in the full-length protein helix A inserts  
352 initially through the more hydrophobic L60-F78 region and then, after protein  
353 rearrangements, repositions the more hydrophilic L49-A69 region at the membrane  
354 core, as found in the solved structure. Accordingly, the translocon inefficiently  
355 inserted the isolated membrane-embedded (L49-A69) region (Fig. 5c, lane 3),  
356 properly inserting helix A only when the full helical sequence is present (Fig. 5c, lane

357 2). When the charge paired residues were placed at a non-permissive distance in  
358 terms of salt bridge interaction ( $i, i+5$ ; Fig. 5e) the insertion efficiency was reduced  
359 (Fig. 5c, lane 4), with a  $\Delta G_{app}$  decrease (absolute values) of  $\sim 0,7$  kcal/mol relative to  
360 the wild type sequence (Fig. 5b). As expected, this effect was not observed when  
361 the same mutations were grafted on the membrane-embedded (S) sequence (Fig.  
362 5c, lane 5).

363         Next, we analysed the salt bridge interaction in HEK-293T cells to study the  
364 translocon performance *in vivo*. When cell cultures were transfected with a Lep-  
365 derived chimera containing the helix A wild type sequence only singly glycosylated  
366 molecules were observed (Fig. 5d, lanes 1 and 2). However, a construct harboring  
367 double mutant (R63I/I64R;  $i, i+5$ ) sequence showed doubly glycosylated molecules  
368 to a measurable extent (Fig. 5d, lanes 3 and 4), indicating a lower insertion efficiency  
369 that can be attributed to the altered salt bridge interaction.

370

### 371 **Effect of salt bridge formation in the absence of previous TM regions.**

372 To investigate the effect of salt bridge formation in translocon-mediated membrane  
373 insertion in the absence of precedent TM regions we used a different glycosylation-  
374 based reporter system in which the TM sequences of interest (bR helix G and  
375 ATPase helix A) were connected to the well-folded constant domain of the antibody  
376  $\lambda$  light chain,  $C_L$  (Feige and Hendershot, 2013). The C-terminal of the TM sequence  
377 carries an Asn-Val-Thr glycosylation site (G2), and we engineered an extra  
378 glycosylation site (G1) within the  $C_L$  sequence (Figure 6a, top). As in the case of the  
379 Lep system, G1 will always be glycosylated due to the native translocation of the  $\lambda$   
380 light chain, but G2 will be glycosylated only upon translocation of the analyzed



381 (tested) sequence across the ER membrane (Figure 6a, bottom). When constructs  
382 harboring either hR helix G or ATPase helix A wild type sequences were transfected  
383 into Hek293T cells, singly glycosylated (reporting insertion) forms were  
384 predominantly found (Fig. 6b, lane 1 and Fig. 6c, lane 2, respectively), discarding  
385 any potential contribution to membrane insertion of precedent TM segments. On  
386 the contrary, sequences containing non-permissive ( $i, i+5$ ) salt-bridge forming pairs  
387 were more efficiently doubly glycosylated (Figures 6b, lane 3 and 6c, lane 4,  
388 respectively). Thus, similar to what was observed using the Lep system (Figures 4f  
389 and 5d), the presence of chair pairs at permissive salt bridge formation distances  
390 strongly promotes helix integration into the ER membrane.

391

## 392 **DISCUSSION**

393 Charged residues found in alpha-helices can both give a stabilizing effect  
394 (Armstrong and Baldwin, 1993) as well as being important for interaction and  
395 function such as in zinc finger motifs (Lin and Lin, 2018). Charged residues have  
396 also been found to be more common in globular (soluble) helices compared to TM  
397 helices (Kauko et al., 2008). This can be explained by the fact that globular helices  
398 reside in a more hydrophilic environment compared to the hydrophobic  
399 environment of the lipid bilayer. An intermediate between these is the existence of  
400 amphipathic alpha-helix in contact with the surface of a bilayer, where one face  
401 contains mainly polar residues facing an aqueous environment and the opposite  
402 face with mostly nonpolar residues facing a hydrophobic environment (Giménez-  
403 Andrés et al., 2018).

404           Whereas pairs of charged residues of the same charge facing the inside  
405 pores in TM regions fill an essential functional role, pairs of oppositely charged  
406 residues can form salt bridges that can stabilize the helix and play an important role  
407 in function such as for transportation (Walther and Ulrich, 2014). Salt bridges might  
408 also be important for hiding the charges during translocon-mediated TM helix  
409 insertion, as the charged residues are hidden from the hydrophobic environment.  
410 Previous work has shown that charged and polar residues are conserved within TM  
411 segments (Illergård et al., 2011), indicating they are crucial for function and/or  
412 stability.

413           Asp-Lys pairs at position  $i, i+4$  and Glu-Lys pairs at position  $i, i+3$  are the  
414 most prevalent as seen previously in Figure 2. They are both among the most  
415 prevalent oppositely charged pairs and the charged pairs that form the highest  
416 number of salt bridges in membrane protein structures. This is in stark contrast to  
417 Glu-Arg pair at position  $i, i+1$  that although as frequent in pairs as Asp-Lys and Glu-  
418 Lys at positions  $i, i+4$  and  $i, i+3$  respectively, only form salt bridges in one-fourth of  
419 the cases as found in Fig. 3b.

420           An interesting observation is that positively charged Arg-Arg pairs at position  
421  $i, i+3$  is numerically the most common pair at this position. Positively charged pairs  
422 at  $i, i+6$  are also more prevalent than expected and although Arg-Arg pairs  
423 numerically only show up half as often at  $i, i+6$  as in  $i, i+3$ , 80% of the Arg-Arg pairs  
424 at position  $i, i+6$  also contain an arginine at  $i+3$ , as found in helices from voltage-  
425 gated ion channels that contain three or more periodically aligned Arg residues with  
426 two intervening hydrophobic residues (Okamura et al., 2015).

427           The fraction of salt bridges at positions  $i$ ,  $i+5$  (Fig. 3b) is an anomaly due to  
428 bend alpha-helices, as found in the helix E from bacterial translocon (PDB ID: 5MG3)  
429 and in the helix A from a lipid flippase (PDB ID: 6CC4) due in both cases to the  
430 presence of a glycine residue (Figure S6). Without the observed helix bending, these  
431 salt bridges would not be formed.

432           By analyzing two native helices containing intra-helical salt bridges we now  
433 find that the free energy of insertion ( $\Delta G_{app}$ ) is significantly reduced if both oppositely  
434 charged residues are spaced at a permissive distance. These results indicate that  
435 intra-helix salt bridge can form during translocon-assisted insertion or even earlier,  
436 since in contrast to globular (soluble) helices, TM helices can be compacted inside  
437 the ribosome exit tunnel (Bañó-Polo et al., 2018). The maximal reduction in  $\Delta G_{app}$   
438 seen with Asp-Lys and Asp-Arg pairs in both hR and  $Ca^{2+}$  ATPase helices is 0.5-0.7  
439 kcal/mol, which is in good agreement with the 0-1 kcal/mol estimated for these two  
440 pairs from thermodynamic peptide partition into octanol experiments (Jayasinghe  
441 et al., 2001). As found in the case of hR helix G (Figures 4f and 6b), this reduction  
442 might be even higher in the cell context, since some auxiliary components of the  
443 membrane insertion machinery (Chitwood and Hegde, 2020; Shurtleff et al., 2018;  
444 Tamborero et al., 2011) can be in suboptimal conditions in the microsomal vesicles.

445           As mentioned above, in the case of hR helix G the lysine residue involved in  
446 the salt bridge (K258) is bound to the retinal chromophore via a protonated Schiff  
447 base as found in the crystal structure of a close homologue (Kolbe et al., 2000).  
448 Then, the lysine residue plays a fundamental role for protein function but at the  
449 same time introduces a penalty for membrane insertion. Interestingly, our data  
450 suggest that helix G translocon-mediated insertion efficiency could be increased by

451 salt bridge formation between K258 and D254, and once in the membrane, retinol  
452 binding to the apoprotein could occur by covalently binding the retinal as a  
453 protonated Schiff base to K258 and perturbing D254 salt bridge interaction.

454         Beyond the conceptual issues involving the membrane insertion process, we  
455 note that the availability of quantitative experimental data on the contribution of salt  
456 bridge interactions to the free energy of insertion ( $\Delta G_{app}$ ) will make it possible to fine-  
457 tune current membrane protein topology-prediction methods based on free energy  
458 calculations. Although today's state of the art topology prediction tools uses  
459 amphiphatic biologically derived scales, they do not take these types of salt bridge  
460 interaction into account. Current algorithms tend to overestimate the free energy  
461 of insertion due to the penalty acquainted by charged residues in the TM region.  
462 However, distinguishing between charged residues of the same or opposite  
463 polarity, i.e., incorporating the effect of potential salt bridges in the reduction of  
464  $\Delta G_{app}$  during membrane integration should help to make prediction tools even more  
465 accurate.

466

## 467 **MATERIALS AND METHODS**

468 **Enzymes and chemicals.** TNT T7 Quick for PCR DNA was from Promega  
469 (Madison, WI, USA). Dog pancreas ER column washed rough microsomes were  
470 from tRNA Probes (College Station, TX, USA). EasyTag™ EXPRESS<sup>35</sup>S Protein  
471 Labeling Mix, [<sup>35</sup>S]-L-methionine and [<sup>35</sup>S]-L-cysteine, for *in vitro* labeling was  
472 purchased from Perkin Elmer (Waltham, MA, USA). Restriction enzymes were from  
473 New England Biolabs (Massachusetts, USA) and endoglycosidase H was from  
474 Roche Molecular Biochemicals (Basel, Switzerland). PCR and plasmid purification  
475 kits were from Thermo Fisher Scientific (Ulm, Germany). All oligonucleotides were  
476 purchased from Macrogen (Seoul, South Korea).

477 **DNA Manipulation.** The sequences of interest were introduced into the modified  
478 Lep sequence from the pGEM1 plasmid (Hessa et al., 2005) between the *SpeI* and  
479 *KpnI* sites using two double-stranded oligonucleotides with overlapping overhangs  
480 at the ends. The complementary oligonucleotides pairs were first annealed at 85 °C  
481 for 10 min followed by gradual cooling to 30 °C and ligated into the vector (a kind  
482 gift from G. von Heijne's lab). Mutations were obtained by site-directed mutagenesis  
483 using the QuikChange kit (Stratagene, La Jolla, California). Lep system including the  
484 sequences of interest in the P2 region were subcloned into *KpnI* linearized pCAGGS  
485 in-house version using In-Fusion HD cloning Kit (Takara) according to the  
486 manufacturer's instructions. An engineered glycosylation site (Q36N) was added to  
487 the C<sub>L</sub>-TM plasmid (a kind gift from L. Hendershot's lab), in which the sequences  
488 from hR helix G and ATPase helix A were introduced flanked by 'insulating' Gly-Pro  
489 tetrapeptides. A c-myc tag (EQKLISEEDL) at the C-terminus of the Lep- and C<sub>L</sub>-  
490 derived sequences was added by PCR before cloning. For *in vitro* assays, DNA was

491 amplified by PCR adding the T7 promoter during the process. All sequences were  
492 confirmed by sequencing the plasmid DNA at Macrogen Company (Seoul, South  
493 Korea).

494 **Translocon-mediated insertion into microsomal membranes.** Lep constructs in  
495 pGEM with L4/A15, L5/A14, 3QBG and 1SU4 segments and its variations were  
496 transcribed and translated using the TNT T7 Quick Coupled System (#L1170,  
497 Promega). Each reaction containing 1  $\mu$ L of PCR product, 0.5 of EasyTag™  
498 EXPRESS 35S Protein Labeling Mix (Perkin Elmer) (5.5  $\mu$ Ci) and 0.3  $\mu$ L of  
499 microsomes (tRNA Probes) was incubated at 30°C for 90 min. Endo H treatment  
500 was done following the manufacturer's instructions. Samples were analysed by  
501 SDS-PAGE (12-14% polyacrylamide). The bands were quantified using a Fuji FLA-  
502 3000 phosphoimager and the Image Reader 8.1j software. Free energy was  
503 calculated using:  $\Delta G_{app} = -RT \ln K_{app}$ , where  $K_{app} = f_{2g}/f_{1g}$  being  $f_{1g}$  and  $f_{2g}$  the fraction of  
504 singly glycosylated and double glycosylated protein, respectively.

505 **Free apparent insertion energy,  $\Delta G$ .** The free insertion energy of a TM region,  $\Delta G$ ,  
506 is calculated as per the experimentally defined Biological hydrophobicity scale  
507 (Hessa et al., 2005). This scoring is amphiphilic with hydrophobic residues  
508 contributing a lower (negative)  $\Delta G$  while hydrophilic contributes a higher (positive)  
509  $\Delta G$ . The total  $\Delta G$  of a region is the sum of individual position specific scores. This  
510 scoring can give an indication of how favorable the amino acid composition of a TM  
511 region is to be inserted in a lipid bilayer membrane. To note is that hydrophobicity  
512 alone is not the only driving force and that the positive inside rule (Heijne, 1989;  
513 Lerch-Bader et al., 2008) and help from proceeding TM regions (Bañó-Polo et al.,  
514 2013; Hedin et al., 2010) can assist insertion in polytopic TM proteins especially.

515 **Core segment definition.** We define core segments as a TM region minus the first  
516 and last 5 residues. This is to ignore the interface regions which are known to  
517 contain polar residues.

518 **Salt bridge definition.** Salt bridges are defined as per (Kumar et al., 2000), where  
519 a salt bridge is defined if a side chain carbonyl oxygen atom in Asp-Glu is within 4.0  
520 Å from the nitrogen atom in Arg-Lys. This conforms to other works (Bosshard et al.,  
521 2004; Donald et al., 2011) with the definition that the atoms are within hydrogen  
522 bond distance. We also define local salt bridges as being bridges that are separated  
523 by at most 7 residues in the sequence. This is to separate long salt bridge  
524 interactions, which can occur between spatially close residues that are separated  
525 in sequence, such as coiled coils where salt bridges can be between separate  
526 alpha-helices.

527 **Transmembrane helices dataset (TM dataset).** The full pipeline is available as a  
528 Makefile together with supporting scripts in the github repository. The full PDBTM  
529 database (Kozma et al., 2013) was downloaded together with their list of non-  
530 redundant protein pdb ids. This list is used to generate both sequence and topology  
531 of the proteins by extracting both from the PDBTM-xml. For each protein in the non-  
532 redundant list, the membrane regions are extracted as per the PDBTM database  
533 annotation. All non-membrane regions are annotated 'i' for convenience. To support  
534 future analysis, membrane regions longer than 10 were run through DSSP and  
535 annotated with 'M' if all residues in the core segment were defined as alpha-helix  
536 ('H'), otherwise, the full membrane region is annotated 'm'. Observe that this creates  
537 fasta-like 3line files, that only contain topological annotation with ambiguous TM  
538 regions annotated as 'm' instead of the normal 'M'. These proteins are then cluster

539 using cd-hit (Fu et al., 2012; Li and Godzik, 2006) at 40% identity using the  
540 parameter -c 0.4 -n 2 -T 0 -M 0 -d 0.

541 During the extraction of TM regions, the corresponding structure file from  
542 RCSB was used to calculate all salt bridges within the current protein and any salt  
543 bridge that has at least one residue within any TM region was saved. Additionally,  
544 all salt bridges whose both residues were within the same segment and within 7  
545 residues of each other were annotated as local as per the salt bridge definition  
546 above.

547 **Extraction of charged residues.** From all annotated TM regions of length 17 or  
548 longer (Baeza-Delgado et al., 2012), the core segment was extracted. All these core  
549 regions were then scanned and when a charged residue was encountered, we  
550 recorded any other charged residue from 7 residues before the current one to 7  
551 residues after. This results in charged residues that can contain a charged pairing  
552 partner outside of the TM segment and will therefore differ slightly from charged  
553 pairs which are defined next.

554 **Extraction of charged pairs.** From all annotated TM regions of length 17 or longer  
555 (Baeza-Delgado et al., 2012), the core segment was extracted. All these core  
556 regions were then scanned and when a charged residue was encountered, we look  
557 at up to 7 residues in front of it or to the end of that core region, whichever came  
558 first. All occurrences of charged pairs were recorded, resulting in charged pairs  
559 where both residues were fully within the core segment of a TM helix.

560 **MSA-dataset extension (TM-MSA).** Using the TM dataset, we extended it by  
561 creating an MSA alignment of each protein using jackhmmer (Eddy, 2011) against



562 Uniref90 with one iteration and an E-value cut off of  $10^{-3}$  with the following  
563 parameters:

564 -N 1 -E 1e-3 --incE 1e-3 --cpu 14

565 From each alignment, we then sampled up to 200 hits, including the initial  
566 seed sequence. If there were fewer than 200 hits, we used them all. We then used  
567 the original topology for each alignment to extract all TM regions, only to include  
568 parts where the sequence covers the full TM region and where the sequence did  
569 not contain any insertions or deletions.

570 **Dataset of helices from globular proteins (GLOB and GLOB-MSA).** To create a  
571 reference dataset of globular  $\alpha$ -helical proteins we extracted all globular all-alpha  
572 protein domains from SCOP. As SCOP classifies domains of proteins resulting in  
573 that one domain of a protein can be annotated as globular whereas another domain  
574 as TM (see 1PPJ chain D as an example) we reduced the SCOP list against the  
575 redundant list of all PDBTM (Kozma et al., 2013) chains to clear any overlap. This  
576 results in 4,500 proteins in total.

577 Topological files with sequence and membrane topology are created with the  
578 help of the RCSB secondary structure file and only membrane segments whose  
579 core region (*i.e.*, central 15 residues) is annotated as pure (canonical)  $\alpha$ -helices were  
580 retained, *i.e.*, those TM segments containing any residues within the core annotated  
581 as loops or other types of secondary structures were removed. This file was further  
582 homology reduced and alignments prepared in the same manner and using the  
583 same parameters as the TM dataset described above.

584 The GLOB-MSA dataset was created in the same way as the TM-MSA  
585 dataset using jackhmmer to extend the sequences to alignments and then to extract  
586 helix sequences.

587 **Redundant (TM-Red) dataset.** The full PDBTM database was used as in the  
588 preparation of the TM dataset. We skip the clustering step and instead use all  
589 redundant proteins to generate their respective topology files. We added in the  
590 constraint that each selected TM region must fully contain at least one potential salt  
591 bridge. This means a local salt bridge where both residues are within the core  
592 segment. This dataset was only used to find potential candidates for further *in vitro*  
593 and *in vivo* experiments. See section of natural salt bridges above.

594 **Calculation of log odds ratio.** The log odds ratios for each amino acid pair for  
595 steps 1 through 10 are calculated as follows:

$$596 \text{logOddsRatio} = \log((A/B)/(C/D))$$

597 Where for two amino acids  $p_1$  and  $p_2$ :

598  $A$  = number of pairs of  $p_1$  to  $p_2$

599  $B$  = number of total pairs

600  $C$  = number of  $p_1$  times number of  $p_2$

601  $D$  = number of total pairs squared

602 The standard error, SE, and z-value is calculated as follows allowing for a two-sided  
603 test:

$$604 SE = \sqrt{(1/A + 1/B + 1/C + 1/D)}$$

$$605 z = \text{abs}(\text{logOddsValue}/SE)$$

606 The survival function, sf, from the scipy python packages is used to calculate the  
607 p-values. To correct for multiple hypothesis, the Bonferroni Correction is used

608 based on the number of hypothesis,  $20 * 20 * 10$ , number of amino acids square  
609 times the number of steps.

610 **Expression in mammalian cells.** Lep or C<sub>L</sub>-derived constructs containing 3QBG  
611 or 1SU4 segments and its variations were tagged with c-myc epitope at their Ct  
612 (EQKLISEEDL) and inserted in the appropriate plasmids. Once the sequence was  
613 verified, plasmids were transfected into HEK293-T cells using Lipofectamine 2000  
614 (Life Technologies) according to the manufacturer's protocol. Approximately 24 h  
615 post-transfection cells were harvested and washed with PBS buffer. After a short  
616 centrifugation (1000 rpm for 5 min on a table-top centrifuge) cells were lysed by  
617 adding 100  $\mu$ L of lysis buffer (30 mM Tris-HCl, 150 mM NaCl, 0.5% Nonidet P-40)  
618 were sonicated in an ice bath in a bioruptor (Diagenode) during 10min and  
619 centrifuged. After protein quantification, equal amounts of protein were submitted  
620 to Endo H treatment or mock-treated followed by SDS-PAGE analysis and  
621 transferred into a PVDF transfer membrane (ThermoFisher Scientific) as previously  
622 described (Duart et al., 2020). Protein glycosylation status was analysed by Western  
623 Blot using an anti-c-myc antibody (Sigma), anti-rabbit IgG-peroxidase conjugated  
624 (Sigma), and with ECL developing reagent (GE Healthcare). Chemiluminescence  
625 was visualized using an ImageQuant<sup>TM</sup> LAS 4000mini Biomolecular Imager (GE  
626 Healthcare).

627

## 628 **Acknowledgments**

629 We thank Pilar Selvi and Beatriz Iborra for excellent technical and administrative  
630 assistance, respectively. The C<sub>L</sub>-TM plasmid was a kind gift from Prof. Linda M.  
631 Hendershot (St. Jude Children's Research Hospital). This work was supported by

632 grants PID2020-119111GB-100 from the Spanish Ministry of Science and  
633 Innovation and PROMETEU/2019/065 from Generalitat Valenciana (to I.M.), and by  
634 grant from the Swedish Research Council (VR-NT 2016-03798 to A.E.). G.D. was  
635 recipient of a predoctoral contract (FPU18/05771) from the Spanish Ministry of  
636 Education.

637 **Conflict of Interest Statement**

638 None declared.

639

640

641 **Table 1.** About 10 % of the core residues in the TM dataset are polar and just under  
 642 4% are charged residues. This is significantly less than 37.5% and 25.5%  
 643 respectively in the globular dataset. In the transmembrane dataset, just over half of  
 644 the charged core residues form a charged pair at distance 1, 3 or 4. \*In the case of  
 645 the globular set, there are more potential charged pairs than charged core residues  
 646 as multiple residues are counted more than once as they form more than one  
 647 potential pairing with separation of 1, 3 or 4 steps. It is clearly seen that although  
 648 the TM dataset contains more helices per protein and has a higher proportion of  
 649 long ( $\geq 17$  residues) helices it contains significantly fewer charged pairs.

| Dataset                                       | TM           | TM-MSA            | GLOB             | GLOB-MSA           |
|-----------------------------------------------|--------------|-------------------|------------------|--------------------|
| <b>Charge statistics</b>                      |              |                   |                  |                    |
| Core residues                                 | 40116        | 3990464           | 74299            | 7388277            |
| Polar core residues                           | 4080 (10.2%) | 490861<br>(12.3%) | 27851<br>(37.5%) | 2696564<br>(36.5%) |
| Charged core residues                         | 1467 (3.7%)  | 204544 (5.1%)     | 18959<br>(25.5%) | 1819047<br>(24.6%) |
| Pairs of charged core residues (+1, +3 or +4) | 825          | 88380             | 23755*           | 2271405*           |
| # of same charged pairs                       | 373          | 45220             | 10835            | 1117270            |
| # of oppositely charged pairs                 | 452          | 43160             | 12920            | 1154135            |
| <b>Charge Pairs statistics</b>                |              |                   |                  |                    |
| <i>Proteins</i>                               | 925          | 130934            | 2475             | 363610             |
| <i>Total alpha helices</i>                    | 5435         | 481729            | 23991            | 2118158            |
| <i>Alpha helices <math>\geq 17</math></i>     | 3755         | 306632            | 5895             | 485797             |
| <i>Proteins with charged pairs</i>            | 204          | 25187             | 1780             | 193534             |
| <i>Helices with charged pairs</i>             | 265          | 34029             | 4251             | 344142             |

|                                                      |     |   |     |   |
|------------------------------------------------------|-----|---|-----|---|
| <i>Proteins with any salt bridge</i>                 | 241 | - | 751 | - |
| <i>Proteins with local salt bridge in helix</i>      | 56  | - | 335 | - |
| <i>Total number of local salt bridges in helices</i> | 59  | - | 577 | - |

650

651

652 **Table 2.** Log odds ratios for all charged pairs, same charged pairs and oppositely  
 653 charged pairs with calculated errors and multiple hypotheses corrected p-values. It  
 654 is clear that charged pairs occur more often than predicted, evidenced by the  
 655 positive log odds ratios in all cases. It is clear that positions +1, +3 and +4 are the  
 656 most prevalent pairings, with the bolded values highlighting log odds ratio above  
 657 0.8. It is also clear that oppositely charged residues which have the potential to form  
 658 salt bridges are prevalent in all three positions whereas the same charge is mainly  
 659 prevalent in position 3. Most likely these same charges facing the same face of the  
 660 helix are involved in functions such as ion transport.

| <i>Spacing</i> | <i>All Log odds</i> |              |                        | <i>Same charged Log odds</i> |              |                       | <i>Oppositely charged Log odds</i> |              |                       |
|----------------|---------------------|--------------|------------------------|------------------------------|--------------|-----------------------|------------------------------------|--------------|-----------------------|
|                | <i>ratio</i>        | <i>error</i> | <i>p-value</i>         | <i>ratio</i>                 | <i>error</i> | <i>p-value</i>        | <i>ratio</i>                       | <i>error</i> | <i>p-value</i>        |
| <b>+1</b>      | <b>0.879</b>        | 0.025        | 1.31e <sup>-257</sup>  | 0.548                        | 0.042        | 4.03e <sup>-41</sup>  | <b>1.107</b>                       | 0.032        | 1.65e <sup>-256</sup> |
| <b>+2</b>      | 0.252               | 0.037        | 2.02e <sup>-08</sup>   | 0.185                        | 0.054        | 1.88e <sup>-00</sup>  | 0.316                              | 0.050        | 1.09e <sup>-06</sup>  |
| <b>+3</b>      | <b>1.073</b>        | 0.026        | <0.00e <sup>-300</sup> | <b>1.118</b>                 | 0.035        | 1.15e <sup>-214</sup> | <b>1.026</b>                       | 0.037        | 5.78e <sup>-165</sup> |
| <b>+4</b>      | <b>0.965</b>        | 0.028        | 1.14e <sup>-253</sup>  | 0.696                        | 0.046        | 2.88e <sup>-49</sup>  | <b>1.177</b>                       | 0.036        | 2.74e <sup>-233</sup> |
| <b>+5</b>      | 0.517               | 0.037        | 4.88e <sup>-42</sup>   | 0.390                        | 0.055        | 4.15e <sup>-09</sup>  | 0.630                              | 0.049        | 1.21e <sup>-34</sup>  |
| <b>+6</b>      | 0.540               | 0.038        | 1.66e <sup>-43</sup>   | 0.545                        | 0.053        | 2.33e <sup>-21</sup>  | 0.536                              | 0.053        | 2.10e <sup>-20</sup>  |
| <b>+7</b>      | 0.615               | 0.038        | 1.21e <sup>-55</sup>   | 0.764                        | 0.050        | 7.78e <sup>-50</sup>  | 0.439                              | 0.058        | 1.97e <sup>-10</sup>  |

661

662

663

664 **FIGURE LEGENDS**

665

666 **Figure 1. Effects on membrane insertion of single or pairs of Asp and Lys**  
667 **residues in a model TM segment. (a)** Schematic representation of the leader  
668 peptidase (Lep) model protein. G1 and G2 denote artificial glycosylation acceptor  
669 sites. The sequence under investigation was introduced in the P2 region after H2.  
670 Recognition of the tested sequence as a TM by the translocon machinery  
671 (highlighted in green) results in the modification of the G1 site but not G2. The Lep  
672 chimera will be double glycosylated if the sequence being tested is not recognized  
673 as a TMD and thus translocated into the microsomes lumen (shown in red). **(b)** The  
674 tested sequences from L4/A15 model TM (including the charged residues, bold),  
675 the gap distance, and the predicted  $\Delta G$  ( $\Delta G_{\text{pred}}$ ) values in kcal/mol are shown. Amino  
676 acids with positive and negative charge are highlighted in blue (K) and red (D)  
677 respectively. **(c)** Experimental  $\Delta G$  ( $\Delta G_{\text{exp}}$ ) in kcal/mol of each tested sequence in the  
678 Lep-based microsomal assay. The mean and standard deviation of at least 3  
679 independent experiments is represented ( $n$  values: 4 [from 1 to 7] and 3 [8 and 9]).  
680 The individual value of each experiment is represented by a solid dot,  $p$ -values  
681 (ordinary one-way ANOVA test with Dunnett correction) are indicated above the  
682 corresponding bars with values  $<0.005$  highlighted in green. In addition, a green  
683 square represents the experimental  $\Delta G$  value for the L4/A15 sequence from an  
684 earlier study [12]. The wt and single mutants are shown in white bars. Charges at  
685 compatible distances with salt bridge formation ( $i, i+1$ ;  $i, i+3$ ; and  $i, i+4$ ) are shown  
686 in brown, orange and yellow, respectively. Not compatible distances with salt bridge  
687 formation ( $i, i+2$ ; and  $i, i+5$ ) are shown in dark gray. The inset shows a representative



688 SDS-PAGE gel for L4/A15 construct. The construct was expressed in rabbit  
689 reticulocyte lysed in the presence (+RM) or absence (-RM) of rough microsomes.  
690 Bands of non-glycosylated proteins are indicated by a white dot; mono and double  
691 glycosylated proteins are indicated by one and two black dots, respectively.

692

693 **Figure 2. Log odds ratios of each pair of amino acids for ' $i, i+1$ ' through ' $i, i+8$ '**  
694 **for the TM-MSA dataset.** The rows on the y-axis indicate the first amino acid in  
695 the pair and the columns on the x-axis the second. The residues are ordered by  
696 hydrophobicity according to the Engelman order (Engelman et al., 1986). See figure  
697 S1 for the equivalent of the globular dataset. S2 and S3 show the same plots  
698 masked for statistical significance.

699

700 **Figure 3. Charge pairs in TM helical sequences and structures.** Helical wheel  
701 projection and lateral views of an  $\alpha$ -helix are shown on top. The initial position  $i$  and  
702 the following 8 residues are numbered. Residues in positions  $i+3$  (orange),  $i+4$   
703 (yellow), and  $i+7$  (light brown) are mainly on the same face of the helix, but  $i+7$  is  
704 placed too far for a salt bridge interaction. **a)** The log odds ratios of charged pairs  
705 for ' $i, i+1$ ' through ' $i, i+8$ ' in the TM dataset. Plain filled bars refer to oppositely  
706 charged pairs and the forward slash are the and same charged pairs, all with error  
707 bars. **b)** Fraction of oppositely charged pairs that form local salt bridges. The small  
708 bump at  $i+5$  are the two proteins 6CC4 (helix A) and 5MG3 (helix E), which both  
709 exhibit a bend in the alpha helix due to the presence of glycine residues (see Fig.  
710 S6).

711

712 **Figure 4. Insertion of halorhodopsin helix G from *Natronomonas pharaonis***  
713 **(3QBG) into microsomal and cellular membranes. (a)** Tested sequences from  
714 3QBG including the gap distance, and the predicted ( $\Delta G_{\text{pred}}$ ) and experimental (*in*  
715 *vitro*  $\Delta G_{\text{exp}}^{\text{in vitro}}$  and *in vivo*  $\Delta G_{\text{exp}}^{\text{in vivo}}$ , respectively)  $\Delta G$  values in kcal/mol are shown.  
716 Amino acids with a positive or negative charge are highlighted in blue (K) and red  
717 (D), respectively. Green numbers indicate negative  $\Delta G$  (insertion) values, while red  
718 numbers denote  $\Delta G$  values above 0 (translocation). **(b)** Frontal view of 3QBG  
719 monomer structure. The helix G is highlighted in orange with the D254 and K258  
720 shown in sticks colored red and blue respectively. The membrane position is  
721 indicated by a red (outer) and blue (inner) discontinuous line, according to OPM  
722 dataset [22]. Lateral **(c)** and upper **(d)** views of the 3QBG trimeric structure. The  
723 helix G is highlighted in orange with the D and K shown in sticks colored red and  
724 blue, respectively. The different monomers are shown in transparent blue, pink and  
725 green. Representative examples ( $n=3$ ) of *in vitro* protein translations in the presence  
726 of ER-derived microsomes **(e)** and Western blots ( $n=3$ ) of *in vivo* protein translations  
727 in HEK-293T cells **(f)** in the presence (+) or absence (-) of Endoglycosidase H  
728 (EndoH), a glycan-removing enzyme. The absence of glycosylation of G1 and G2  
729 acceptor sites is indicated by two white dots, single glycosylation by one white and  
730 one black dot, and double glycosylation by two black dots. **(g)** Zoom view centered  
731 on the salt bridge between D254 and K257 at  $i, i+4$  (left) and  $i, i+5$  (right) gaps. D  
732 and K residues are shown in sticks colored red and blue, respectively, while the  
733 dashed line indicates the  $\text{RCOO}^-$  to  $\text{RNH}_3^+$  distance.

734

735 **Figure 5. Insertion of Calcium ATPase (1SU4) helix A into microsomal and**

736 **cellular membranes. (a)** Lateral view of 1SU4 structure. Zoom view of the A helix  
737 (right panel). The membrane-embedded region of helix A is highlighted in yellow.  
738 Charged amino acids are shown as sticks in blue (R), red (D) and pink (E),  
739 respectively. L49, A69 and F78 are also shown as sticks to define helix's  
740 subdomains. The membrane location is indicated by red (outer) and blue (inner)  
741 discontinuous lines according to OPM dataset [22] and the distance between the R  
742 and D charges is indicated in Å. **(b)** Helix A-derived sequences from 1SU4 including  
743 the gap between charged residues, and the predicted ( $\Delta G_{\text{pred}}$ ) and experimental (*in*  
744 *vitro*  $\Delta G_{\text{exp}}^{\text{in vitro}}$  and *in vivo*  $\Delta G_{\text{exp}}^{\text{in vivo}}$ , respectively)  $\Delta G$  values in kcal/mol are shown.  
745 Amino acids with a positive charge are highlighted in blue (K) while negatively  
746 charged are marked in red (D) and pink (E). The residues predicted as TM by the  $\Delta G$   
747 Prediction server are underlined. Green numbers indicate negative  $\Delta G$  (insertion)  
748 values while red numbers denote  $\Delta G$  values above 0 (translocation). Representative  
749 examples (n=3) of *in vitro* protein translations in the presence of ER-derived  
750 microsomes **(c)** and Western blots (n=3) of *in vivo* protein translation in HEK-293T  
751 cells **(d)** in the presence (+) or absence (-) of Endoglycosidase H (EndoH), a glycan-  
752 removing enzyme. The absence of glycosylation of G1 and G2 acceptor sites is  
753 indicated by two white dots, single glycosylation by one white and one black dot,  
754 and double glycosylation by two black dots. **(e)** 1SU4 helix A *i, i+5* mutant. The  
755 membrane-embedded region of helix A is highlighted in yellow. Charged residues  
756 are shown as sticks in blue (R), red (D) and pink (E). L49, A69 and F78 are also  
757 shown as sticks to define helix's subdomains. The membrane is indicated by red  
758 (outer) and blue (inner) discontinuous lines as in (a), and the dashed line indicates  
759 the  $\text{RCOO}^-$  and  $\text{RC}(\text{NH}_2)_2^+$  distance.

760

761 **Figure 6. Salt bridge effect on the insertion in the absence of preceding TM**

762 **segments. (a)** (Top) Schematic of the C<sub>L</sub>TM construct used. It is composed of the

763 domain of the antibody  $\lambda$  light chain (C<sub>L</sub>) containing a glycosylation site (G1)

764 connected by flexible linkers to the sequence of analysis followed by a C-terminal

765 glycosylation site (G2) and a c-myc tag. (Bottom) Scheme depicting the main

766 features of the C<sub>L</sub>TM insertion assay. Black dots represent glycosylated sites while

767 white dots represent non-glycosylated sites. **(b)** Representative halorhodopsin

768 (3QBG) helix G western blot ( $n=3$ ) of *in vivo* protein translations in HEK-293T cells

769 in the presence (+) or absence (-) of Endoglycosidase H (EndoH), a glycan-removing

770 enzyme. **(c)** Representative Ca<sup>2+</sup> ATPase (1SU4) helix A western blot ( $n=3$ ) of *in vivo*

771 protein translations in HEK-293T cells in the presence (+) or absence (-) of EndoH.

772 Non-glycosylated proteins are indicated by two white dots, singly-glycosylated

773 proteins are indicated by one white and one black dot, and doubly-glycosylated

774 proteins are indicated by two black dots. Experimental  $\Delta G$  values (kcal/mol) are

775 shown above each sample ( $n=3$ ).

776

777 **Figure S1. Effects on membrane insertion of single or pairs of Asp and Lys**

778 **residues in L5/A14. a)** The tested sequences from L5/A14 model TM (including the

779 charged residues, bold), the gap distance, and the predicted  $\Delta G$  ( $\Delta G_{\text{pred}}$ ) and

780 experimental ( $\Delta G_{\text{exp}}$ ) values in kcal/mol are shown. Amino acids with positive and

781 negative charge are highlighted in blue (K) and red (D) respectively. **b)** Experimental

782  $\Delta G$  ( $\Delta G_{\text{exp}}$ ) in kcal/mol of each tested sequence in the Lep-based microsomal assay.

783 The mean and standard deviation of 3 independent experiments are represented.

784 The individual value of each experiment is represented by a solid dot,  $p$ -values are  
785 indicated above. In addition, a green dot represents the  $\Delta G_{\text{pred}}$  value for the L5/A14  
786 sequence. The wt and single mutants are shown in white bars. Charges at  
787 compatible distances with salt bridge formation ( $i, i+3$ ; and  $i, i+4$ ) are shown in  
788 orange and yellow, respectively. Not compatible distances with salt bridge  
789 formation ( $i, i+5$ ) is shown in gray. The inset shows a representative SDS-PAGE gel  
790 for L4/A15 and L5/A14 constructs. The construct was expressed in rabbit  
791 reticulocyte lysed in the presence (+RM) or absence (-RM) of column washed rough  
792 microsomes. Bands of non-glycosylated proteins are indicated by a white dot;  
793 mono and double glycosylated proteins are indicated by one and two black dots,  
794 respectively.

795

796 **Figure S2. Log odds ratios of each pair of amino acids for ' $i, i+1$ ' through ' $i, i+8$ '**  
797 **for the GLOB-MSA dataset.** Log odds ratios for the middle core residues of  $\alpha$ -  
798 helices of at least 17 residues in length in the GLOB-MSA dataset. The rows on the  
799 y-axis indicate the first amino acid in the pair and the columns on the x-axis the  
800 second. The residues are ordered as in Fig. 2.

801

802 **Figure S3. Log odds ratios of each pair of amino acids for ' $i, i+1$ ' through ' $i, i+8$ '**  
803 **for the GLOB-MSA dataset.** Log odds ratios as in S2 but all pairs with  $P$ -  
804 value  $>0.05$  have been masked.

805

806 **Figure S4. Masked log odds ratios of each pair of amino acids for ' $i, i+1$ '**  
807 **through ' $i, i+8$ ' for the TM-MSA dataset.** Log odds ratios as in Fig. 2 but all pairs

808 with P-value >0.05 have been masked.

809

810 **Figure S5.** Histogram of  $\Delta G_{\text{pred}}$  values for the salt bridge containing TM segments.

811  $\Delta G$  values represented with a bin size of 0.8 kcal/mol, with negative (indicative of

812 insertion) and positive (indicative of non-inserted) values highlighted with a green

813 and red background, respectively. Halorhodopsin 3QBG helix G ( $\Delta G_{\text{pred}}$  of 1.73

814 kcal/mol) and Ca<sup>2+</sup> ATPase helix A ( $\Delta G_{\text{pred}}$  of 4.15 kcal/mol) are part of the left and

815 right blue highlighted bars, respectively.

816

817 **Figure S6. Salt bridges at pair  $i, i+5$ .** Left: helix E from bacterial translocon (PDB

818 ID: 5MG3). Glycine (orange) residue causes a kink facilitating salt bridge interaction

819 between Asp50 (red) and Arg55 (blue). Right: helix A from a lipid flippase (PDB ID:

820 6CC4). Glycine (orange) residue causes a kink facilitating salt bridge interaction

821 between Arg153 (blue) and Glu158 (red). Distances are shown in Ångström.

822

## 823 REFERENCES

824 Andreeva, A., Howorth, D., Chothia, C., Kulesha, E., and Murzin, A.G. (2013).  
825 SCOP2 prototype: a new approach to protein structure mining. *Nucleic Acids Res.*  
826 *42*, D310–D314.

827 Andreeva, A., Kulesha, E., Gough, J., and Murzin, A.G. (2019). The SCOP  
828 database in 2020: expanded classification of representative family and  
829 superfamily domains of known protein structures. *Nucleic Acids Res.* *48*, D376–  
830 D382.

831 Armstrong, K.M., and Baldwin, R.L. (1993). Charged histidine affects alpha-helix  
832 stability at all positions in the helix by interacting with the backbone charges.  
833 *Proc. Natl. Acad. Sci. U.S.a.* *90*, 11337–11340.

834 Baeza-Delgado, C., Heijne, von, G., Marti-Renom, M.A., and Mingarro, I. (2016).  
835 Biological insertion of computationally designed short transmembrane segments.  
836 *Sci. Rep.* 1–9.

- 837 Baeza-Delgado, C., Marti-Renom, M.A., and Mingarro, I. (2012). Structure-based  
838 statistical analysis of transmembrane helices. *Eur Biophys J* 42, 199–207.
- 839 Bañó-Polo, M., Baeza-Delgado, C., Orzáez, M., Marti-Renom, M.A., Abad, C., and  
840 Mingarro, I. (2012). Polar/Ionizable Residues in Transmembrane Segments: Effects  
841 on Helix-Helix Packing. *PLoS ONE* 7, e44263.
- 842 Bañó-Polo, M., Baeza-Delgado, C., Tamborero, S., Hazel, A., Grau, B., Nilsson, I.,  
843 Whitley, P., Gumbart, J.C., Heijne, von, G., and Mingarro, I. (2018).  
844 Transmembrane but not soluble helices fold inside the ribosome tunnel. *Nat*  
845 *Commun* 9, 5246.
- 846 Bañó-Polo, M., Martínez-Gil, L., Barrera, F.N., and Mingarro, I. (2019). Insertion of  
847 Bacteriorhodopsin Helix C Variants into Biological Membranes. *ACS Omega* 5,  
848 556–560.
- 849 Bañó-Polo, M., Martínez-Gil, L., Wallner, B., Nieva, J.L., Elofsson, A., and  
850 Mingarro, I. (2013). Charge Pair Interactions in Transmembrane Helices and Turn  
851 Propensity of the Connecting Sequence Promote Helical Hairpin Insertion. *J Mol*  
852 *Biol* 425, 830–840.
- 853 Bosshard, H.R., Marti, D.N., and Jelesarov, I. (2004). Protein stabilization by salt  
854 bridges: concepts, experimental approaches and clarification of some  
855 misunderstandings. *J. Mol. Recognit.* 17, 1–16.
- 856 Braunger, K., Pfeffer, S., Shrimal, S., Gilmore, R., Berninghausen, O., Mandon,  
857 E.C., Becker, T., Förster, F., and Beckmann, R. (2018). Structural basis for  
858 coupling protein transport and N-glycosylation at the mammalian endoplasmic  
859 reticulum. *Science* 360, 215–219.
- 860 Chin, C.N., and Heijne, von, G. (2000). Charge pair interactions in a model  
861 transmembrane helix in the ER membrane. *J Mol Biol* 303, 1–5.
- 862 Chitwood, P.J., and Hegde, R.S. (2020). An intramembrane chaperone complex  
863 facilitates membrane protein biogenesis. *Nature* 584, 1–22.
- 864 Donald, J.E., Kulp, D.W., and DeGrado, W.F. (2011). Salt bridges: Geometrically  
865 specific, designable interactions. *Proteins* 79, 898–915.
- 866 Duart, G., García-Murria, M.J., Grau, B., Acosta-Cáceres, J.M., Martínez-Gil, L.,  
867 and Mingarro, I. (2020). SARS-CoV-2 envelope protein topology in eukaryotic  
868 membranes. *Open Biol.* 10, 200209–6.
- 869 Eddy, S.R. (2011). Accelerated Profile HMM Searches. *PLoS Comput Biol* 7,  
870 e1002195.
- 871 Engelman, D.M., Steitz, T.A., and Goldman, A. (1986). Identifying nonpolar  
872 transbilayer helices in amino acid sequences of membrane proteins. *Annu Rev*  
873 *Biophys Chem* 15, 321–353.



- 874 Feige, M.J., and Hendershot, L.M. (2013). Quality Control of Integral Membrane  
875 Proteins by Assembly-Dependent Membrane Integration. *Mol Cell* 51, 297–309.
- 876 Fu, L., Niu, B., Zhu, Z., Wu, S., and Li, W. (2012). CD-HIT: accelerated for  
877 clustering the next-generation sequencing data. *Bioinformatics* 28, 3150–3152.
- 878 Giménez-Andrés, M., Čopič, A., and Antonny, B. (2018). The Many Faces of  
879 Amphipathic Helices. *Biomolecules* 8, 45–14.
- 880 Hedin, L.E., Ojemalm, K., Bernsel, A., Hennerdal, A., Illergård, K., Enquist, K.,  
881 Kauko, A., Cristobal, S., Heijne, von, G., Lerch-Bader, M., et al. (2010). Membrane  
882 insertion of marginally hydrophobic transmembrane helices depends on sequence  
883 context. *J Mol Biol* 396, 221–229.
- 884 Heijne, von, G. (1989). Control of topology and mode of assembly of a polytopic  
885 membrane protein by positively charged residues. *Nature* 341, 456–458.
- 886 Hessa, T., Kim, H., Bihlmaier, K., Lundin, C., Boekel, J., Andersson, H., Nilsson, I.,  
887 White, S.H., and Heijne, von, G. (2005). Recognition of transmembrane helices by  
888 the endoplasmic reticulum translocon. *Nature* 433, 377–381.
- 889 Hessa, T., Meindl-Beinker, N.M., Bernsel, A., Kim, H., Sato, Y., Lerch-Bader, M.,  
890 Nilsson, I., White, S.H., and Heijne, von, G. (2007). Molecular code for  
891 transmembrane-helix recognition by the Sec61 translocon. *Nature* 450, 1026–  
892 1030.
- 893 Illergård, K., Kauko, A., and Elofsson, A. (2011). Why are polar residues within the  
894 membrane core evolutionary conserved? *Proteins* 79, 79–91.
- 895 Jayasinghe, S., Hristova, K., and White, S.H. (2001). Energetics, stability, and  
896 prediction of transmembrane helices. *J Mol Biol* 312, 927–934.
- 897 Kanada, S., Takeguchi, Y., Murakami, M., Ihara, K., and Kouyama, T. (2011).  
898 Crystal Structures of an O-Like Blue Form and an Anion-Free Yellow Form of  
899 pharaonis Halorhodopsin. *J Mol Biol* 413, 162–176.
- 900 Kauko, A., Hedin, L.E., Thebaud, E., Cristobal, S., Elofsson, A., and Heijne, von, G.  
901 (2010). Repositioning of transmembrane alpha-helices during membrane protein  
902 folding. *J Mol Biol* 397, 190–201.
- 903 Kauko, A., Illergård, K., and Elofsson, A. (2008). Coils in the Membrane Core Are  
904 Conserved and Functionally Important. *J Mol Biol* 380, 170–180.
- 905 Kolbe, M., Besir, H., Essen, L.O., and Oesterhelt, D. (2000). Structure of the light-  
906 driven chloride pump halorhodopsin at 1.8 Å resolution. *Science* 288, 1390–1396.
- 907 Kozma, D., Simon, I., and Tusnády, G.E. (2013). PDBTM: Protein Data Bank of  
908 transmembrane proteins after 8 years. *Nucleic Acids Res.* 41, D524–D529.



- 909 Kumar, S., Ma, B., Tsai, C.J., and Nussinov, R. (2000). Electrostatic strengths of  
910 salt bridges in thermophilic and mesophilic glutamate dehydrogenase monomers.  
911 *Proteins* 38, 368–383.
- 912 Kumar, S., and Nussinov, R. (2002). Relationship between Ion Pair Geometries  
913 and Electrostatic Strengths in Proteins. *Biophys J* 83, 1595–1612.
- 914 Lerch-Bader, M., Lundin, C., Kim, H., Nilsson, I., and Heijne, von, G. (2008).  
915 Contribution of positively charged flanking residues to the insertion of  
916 transmembrane helices into the endoplasmic reticulum. *105*, 4127–4132.
- 917 Li, W., and Godzik, A. (2006). Cd-hit: a fast program for clustering and comparing  
918 large sets of protein or nucleotide sequences.
- 919 Lin, C.-Y., and Lin, L.-Y. (2018). The conserved basic residues and the charged  
920 amino acid residues at the  $\alpha$ -helix of the zinc finger motif regulate the nuclear  
921 transport activity of triple C2H2 zinc finger proteins. *PLoS ONE* 13, e0191971–20.
- 922 Marqusee, S., and Baldwin, R.L. (1987). Helix stabilization by Glu-...Lys+ salt  
923 bridges in short peptides of de novo design. *Proc. Natl. Acad. Sci. U.S.a.* 84,  
924 8898–8902.
- 925 Martínez-Gil, L., Saurí, A., Marti-Renom, M.A., and Mingarro, I. (2011). Membrane  
926 protein integration into the endoplasmic reticulum. *Febs J* 278, 3846–3858.
- 927 Mbaye, M.N., Hou, Q., Basu, S., Teheux, F., Pucci, F., and Rooman, M. (2019). A  
928 comprehensive computational study of amino acid interactions in membrane  
929 proteins. *Sci. Rep.* 9, 12043–14.
- 930 Okamura, Y., Fujiwara, Y., and Sakata, S. (2015). Gating Mechanisms of Voltage-  
931 Gated Proton Channels. *Annu Rev Biochem* 84, 685–709.
- 932 Samanta, U., Pal, D., and Chakrabarti, P. (1999). Packing of aromatic rings against  
933 tryptophan residues in proteins. *Acta Cryst* (1999). D55, 1421-1427  
934 [Doi:10.1107/S090744499900726X] 1–7.
- 935 Shurtleff, M.J., Itzhak, D.N., Hussmann, J.A., Schirle Oakdale, N.T., Costa, E.A.,  
936 Jonikas, M., Weibezahn, J., Popova, K.D., Jan, C.H., Sinitcyn, P., et al. (2018). The  
937 ER membrane protein complex interacts cotranslationally to enable biogenesis of  
938 multipass membrane proteins. *eLife* 7, 382.
- 939 Tamborero, S., Vilar, M., Martínez-Gil, L., Johnson, A.E., and Mingarro, I. (2011).  
940 Membrane insertion and topology of the translocating chain-associating  
941 membrane protein (TRAM). *J Mol Biol* 406, 571–582.
- 942 Toyoshima, C., Nakasako, M., Nomura, H., and Ogawa, H. (2000). Crystal  
943 structure of the calcium pump of sarcoplasmic reticulum at 2.6 Å resolution.  
944 *Nature* 405, 647–655.

- 945 Tsirigos, K.D., Govindarajan, S., Bassot, C., Västermark, Å., Lamb, J., Shu, N., and  
946 Elofsson, A. (2018). ScienceDirect Topology of membrane proteins – predictions,  
947 limitations and variations. *Curr Opin Struct Biol* 50, 9–17.
- 948 Tsirigos, K.D., Peters, C., Shu, N., Käll, L., and Elofsson, A. (2015). The TOPCONS  
949 web server for consensus prediction of membrane protein topology and signal  
950 peptides. *Nucleic Acids Res.* 43, W401–W407.
- 951 Walther, T.H., and Ulrich, A.S. (2014). Transmembrane helix assembly and the role  
952 of salt bridges. *Curr Opin Struct Biol* 27, 63–68.
- 953

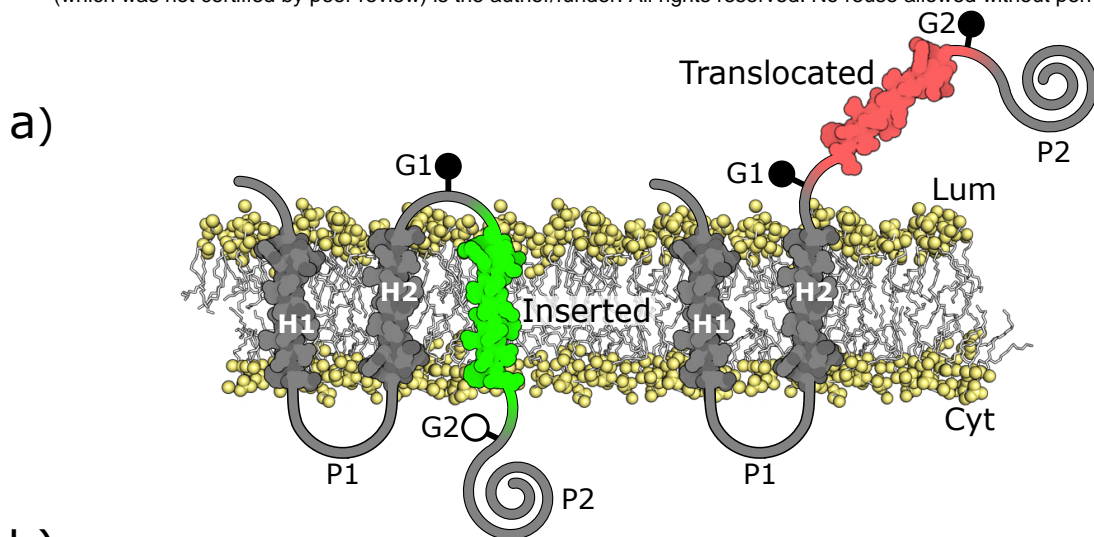

b)

| AA     | Gap | Sequence                                                        | $\Delta G_{\text{pred.}}$ | $\Delta G_{\text{exp.}}$ |
|--------|-----|-----------------------------------------------------------------|---------------------------|--------------------------|
| L4/A15 | -   | AAAA <sup>8</sup> LAL <sup>12</sup> AAAAALALAAAA                | -0.49                     | -0.40 ± 0.11             |
| K      | -   | AAAA <sup>8</sup> LAL <sup>12</sup> KAAAAALALAAAA               | +1.41                     | +0.15 ± 0.07             |
| D      | -   | AAAA <sup>8</sup> LAL <sup>12</sup> AAAA <sup>12</sup> DLALAAAA | +1.39                     | +0.14 ± 0.07             |
| KD     | 1   | AAAA <sup>8</sup> LAL <sup>12</sup> AAAKDLALAAAA                | +3.22                     | +0.18 ± 0.04             |
| KD     | 2   | AAAA <sup>8</sup> LAL <sup>12</sup> AAKADLALAAAA                | +2.93                     | +0.27 ± 0.05             |
| KD     | 3   | AAAA <sup>8</sup> LAL <sup>12</sup> AKAADLALAAAA                | +3.35                     | +0.22 ± 0.03             |
| KD     | 4   | AAAA <sup>8</sup> LAL <sup>12</sup> KAAADLALAAAA                | +3.34                     | +0.13 ± 0.05             |
| KD     | 5   | AAAA <sup>8</sup> LAK <sup>12</sup> LAAADLALAAAA                | +2.98                     | +0.31 ± 0.02             |
| DD     | 4   | AAAA <sup>8</sup> LAL <sup>12</sup> DAAADLALAAAA                | +3.55                     | +0.23 ± 0.01             |

c)

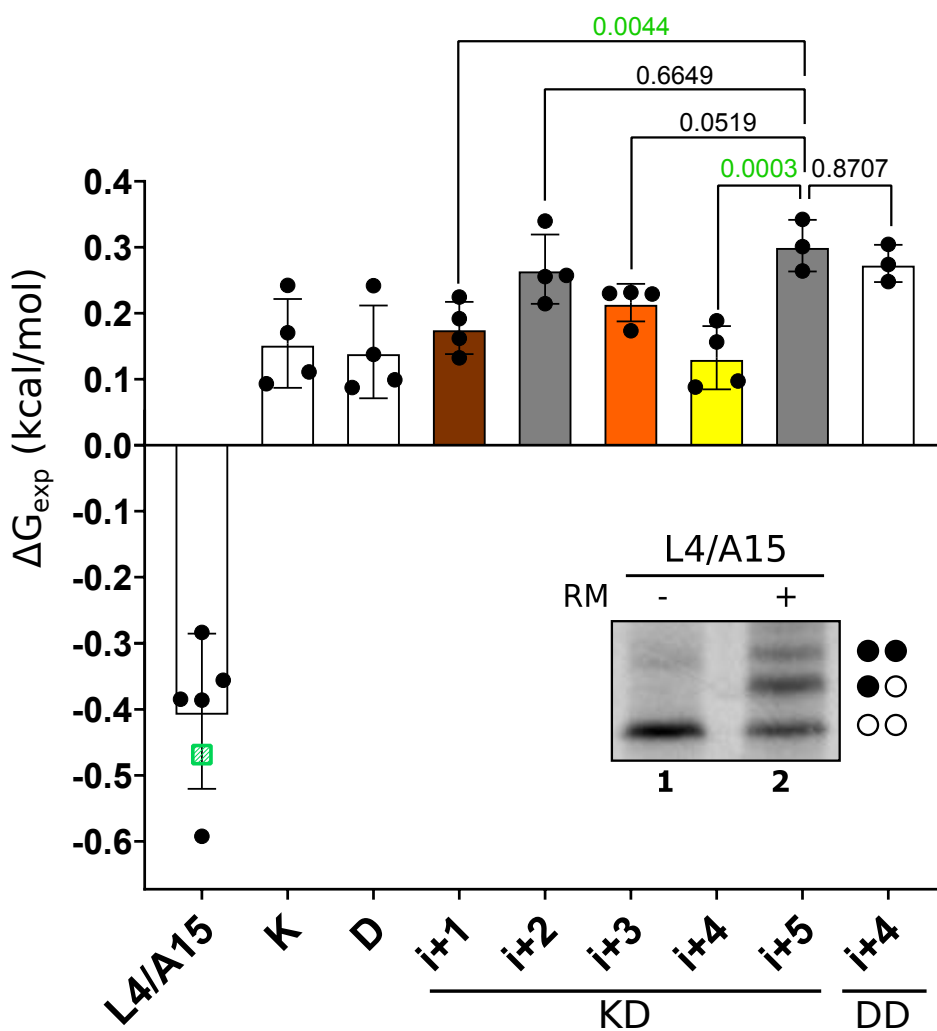

Figure 2

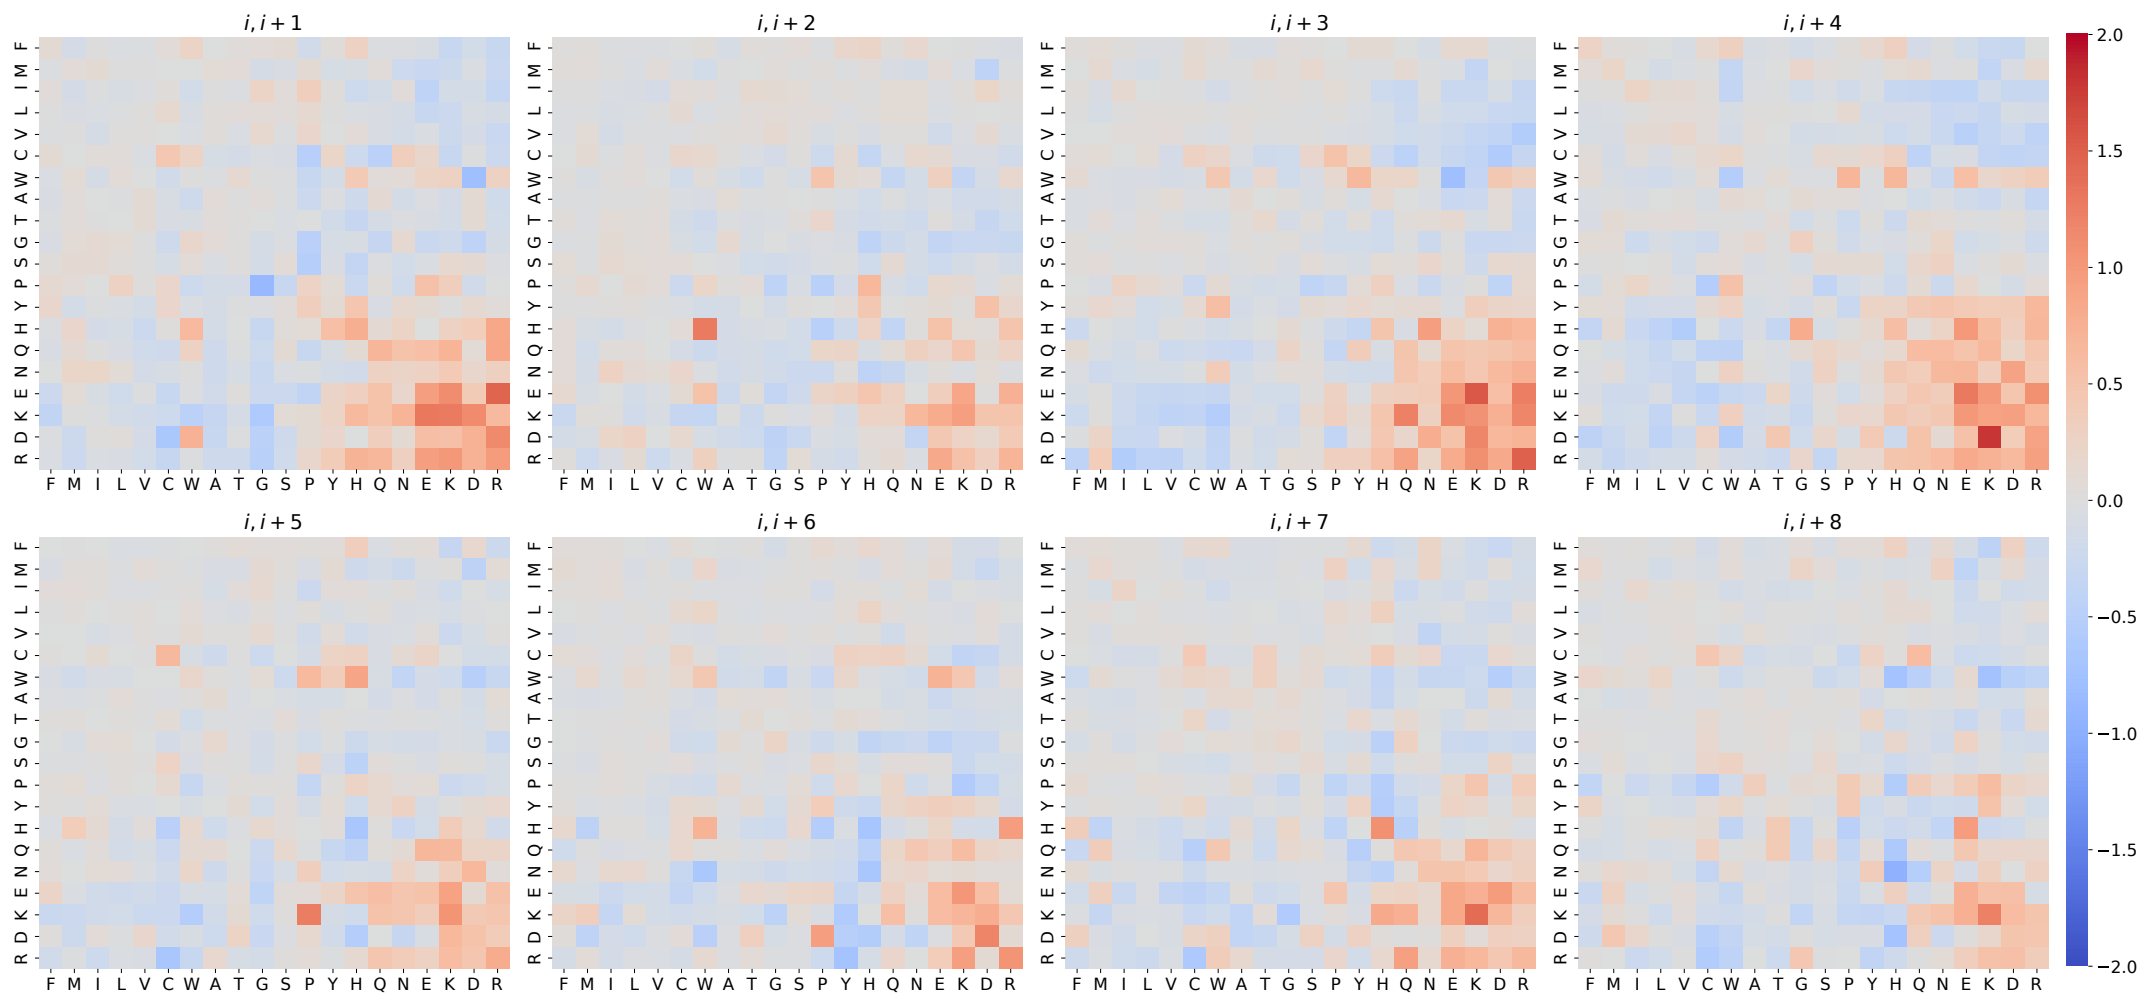

### Figure 3

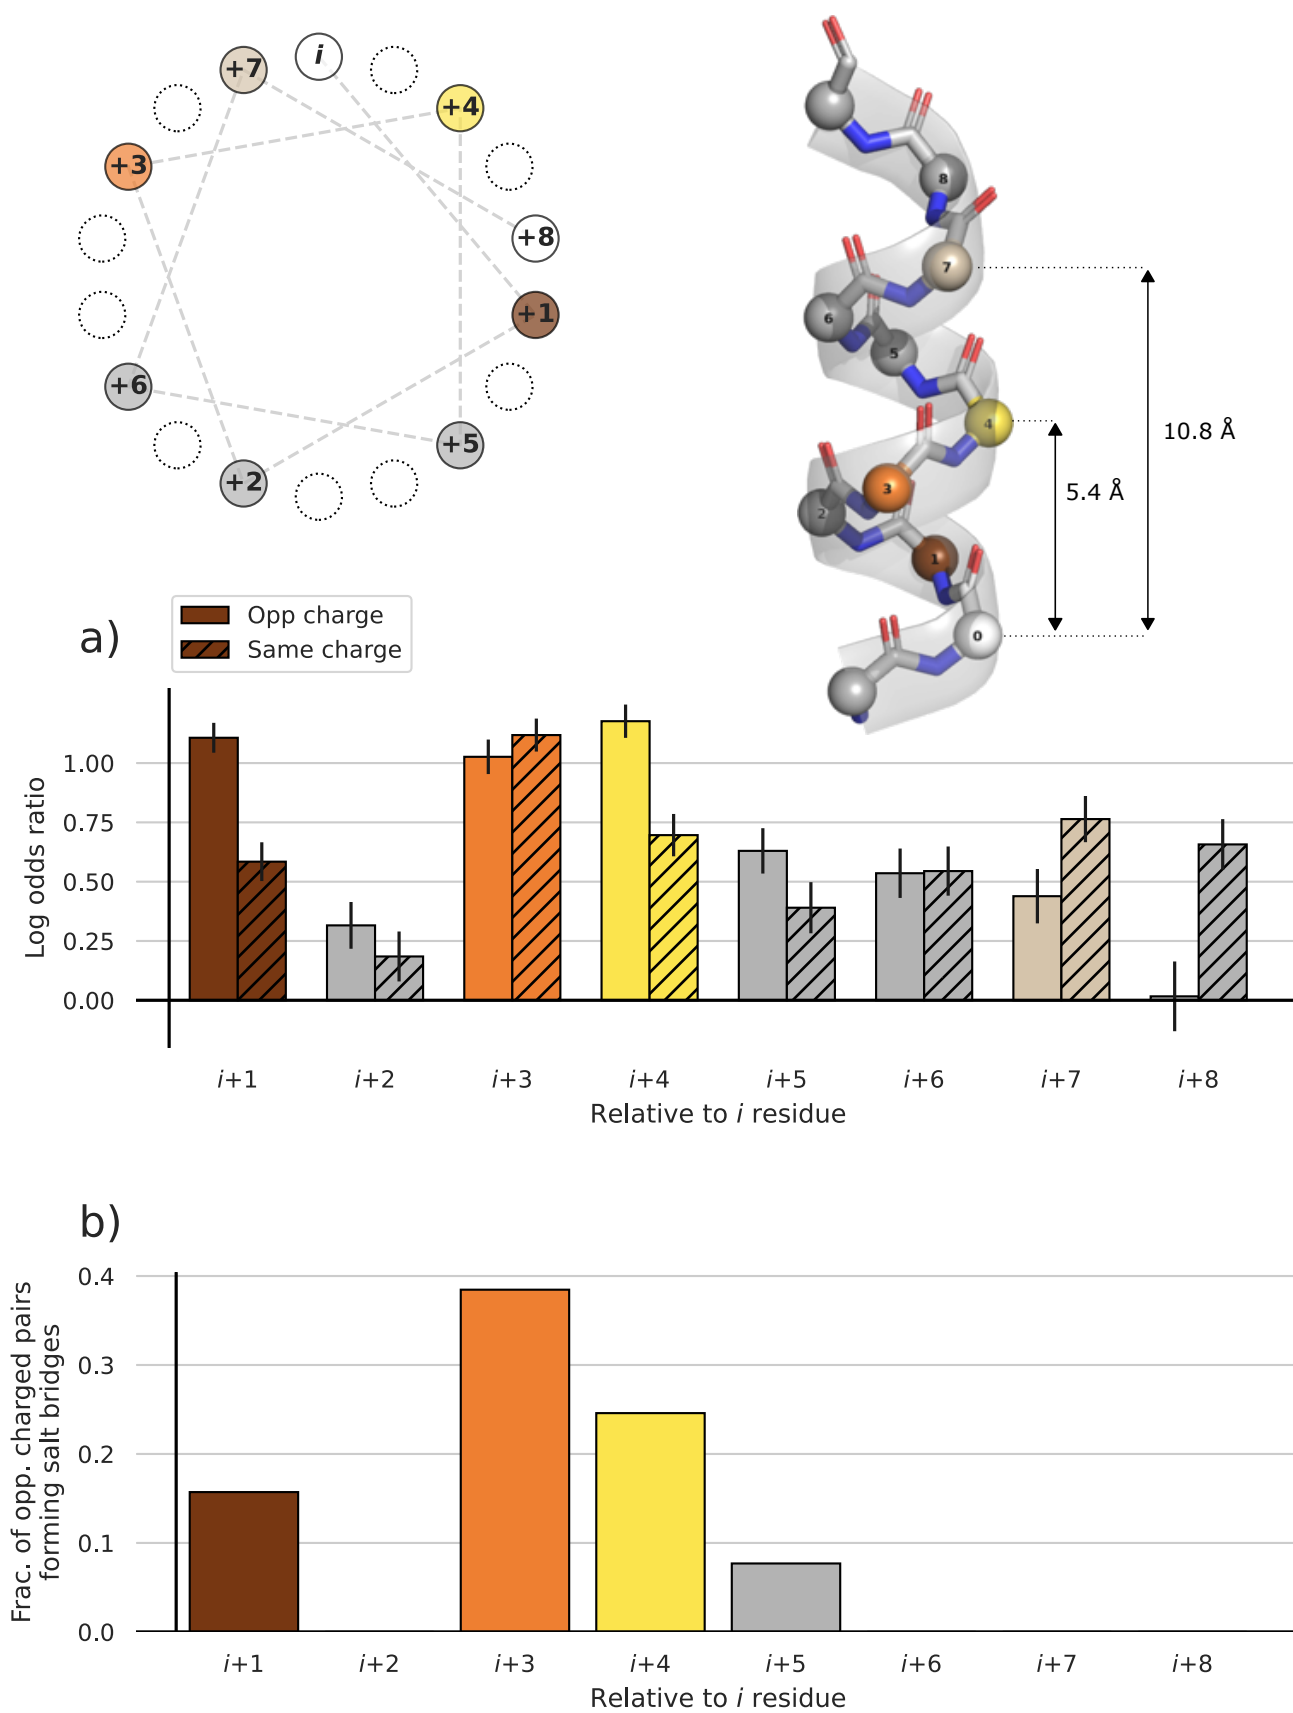

Figure 4

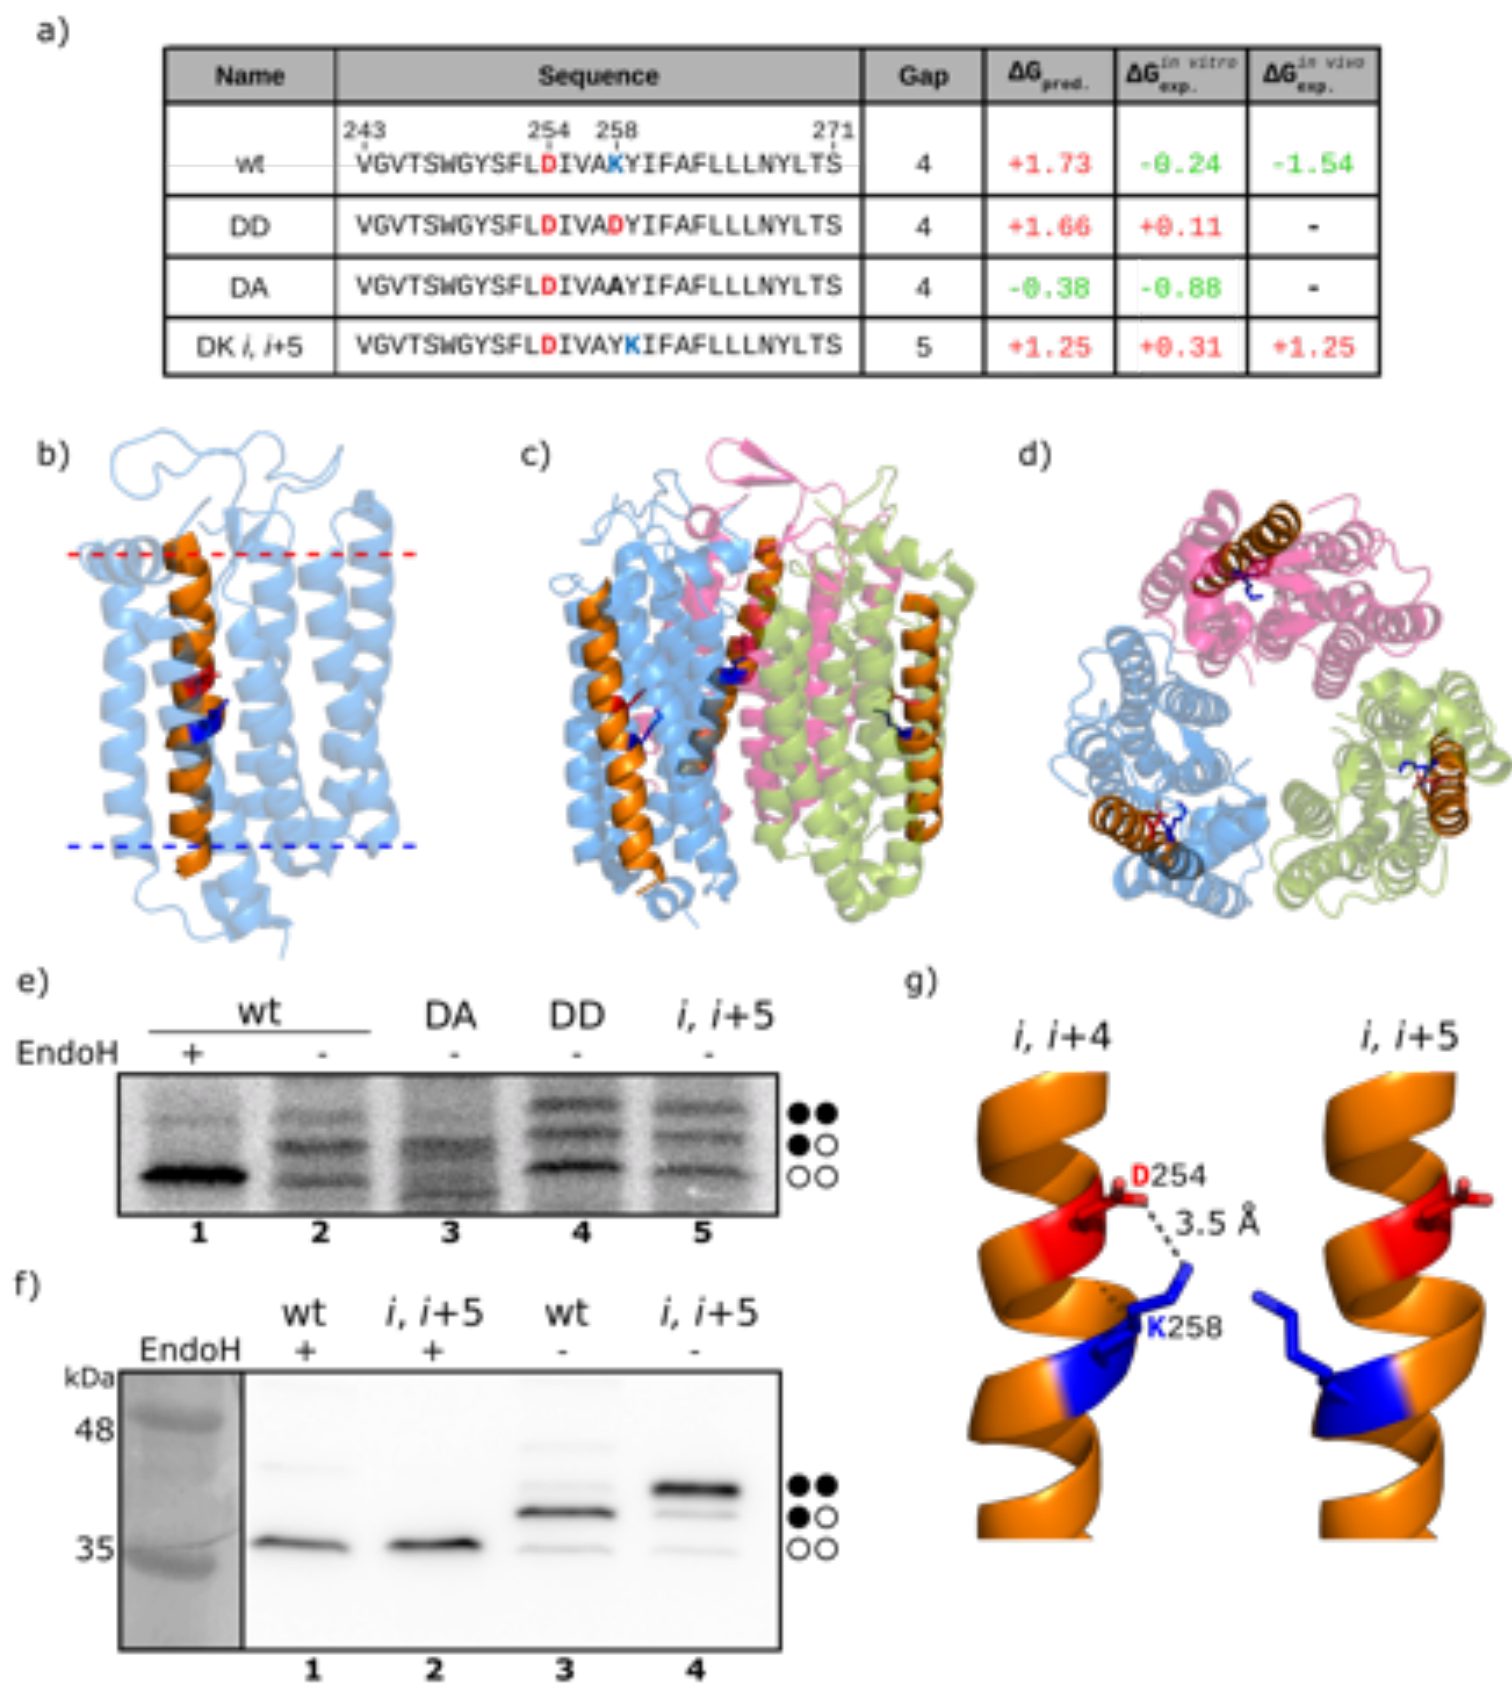

Figure 9

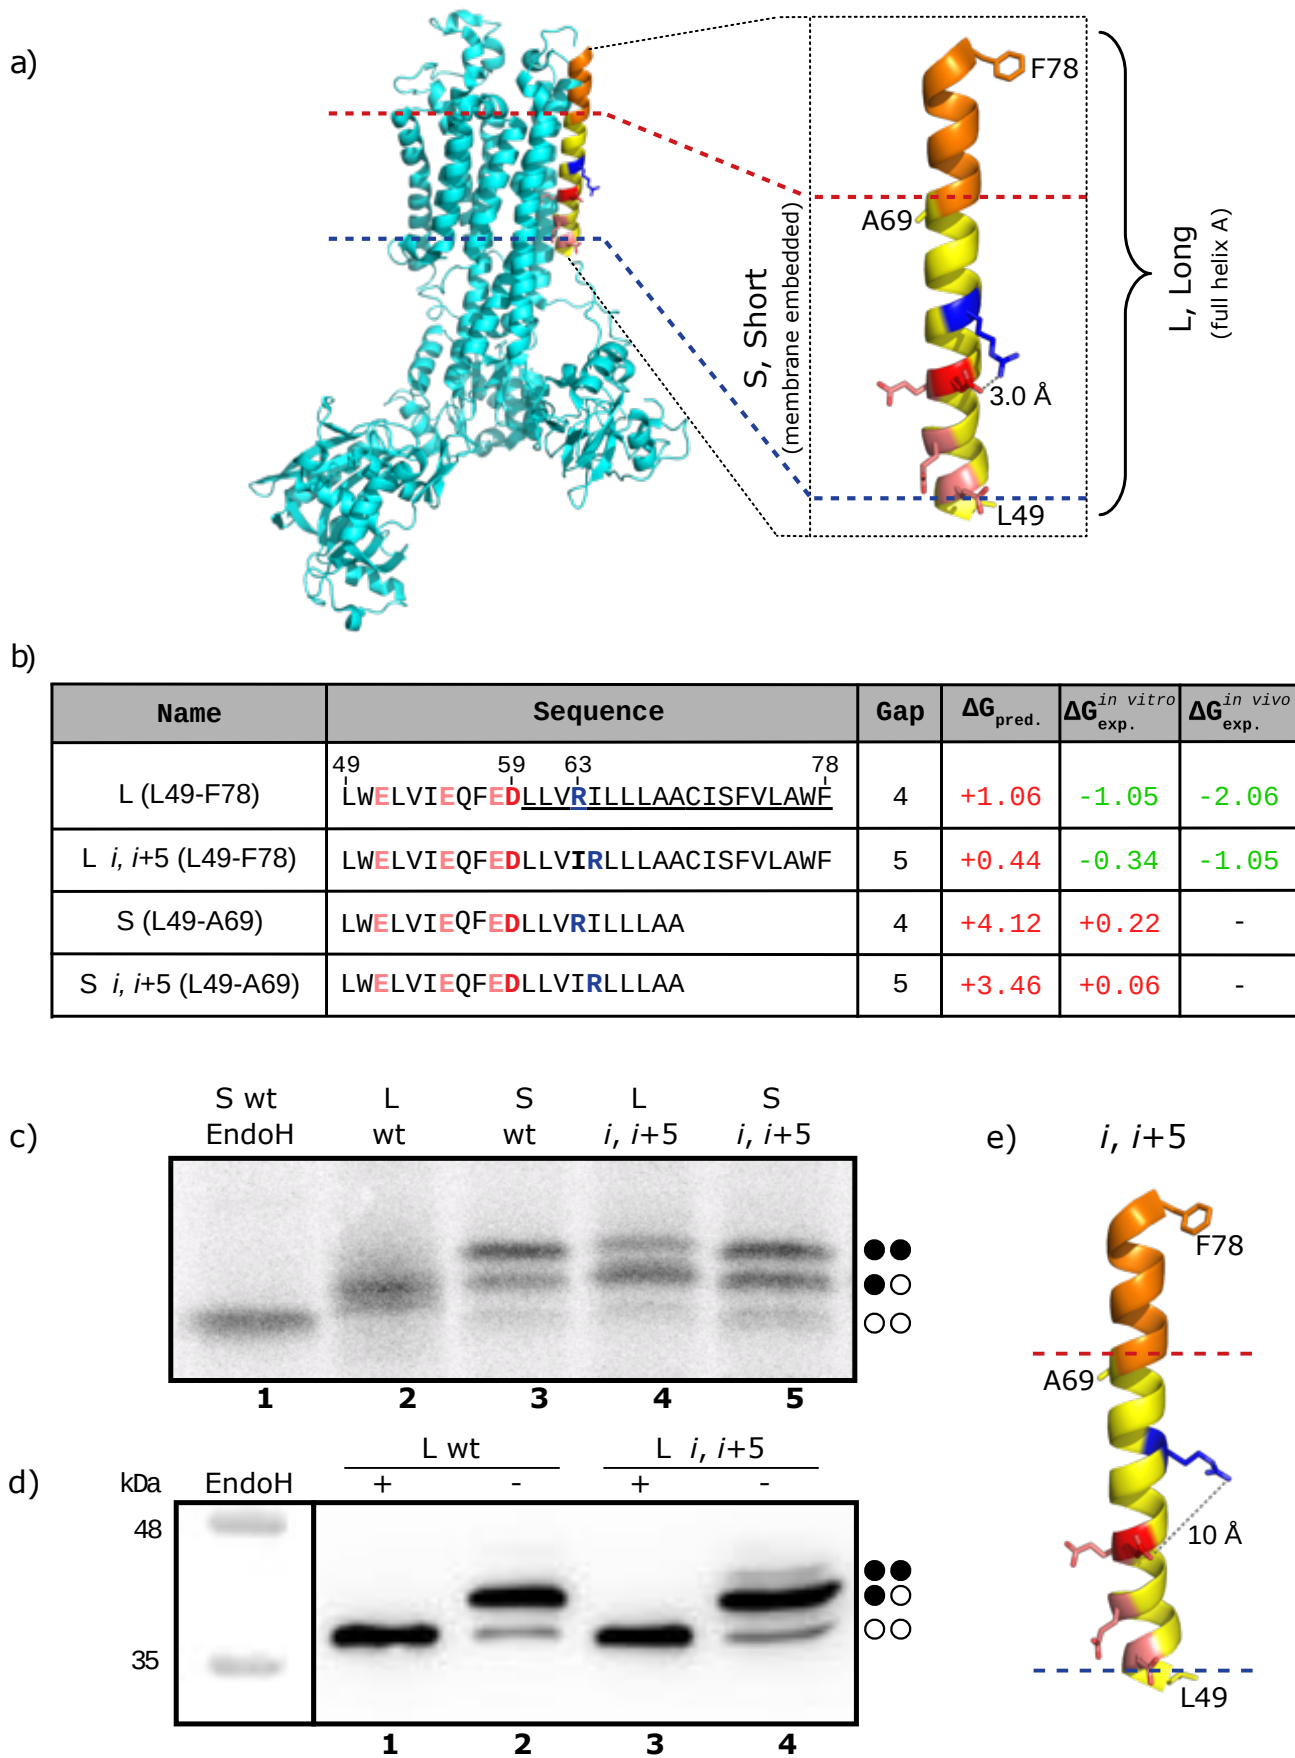

Figure 6

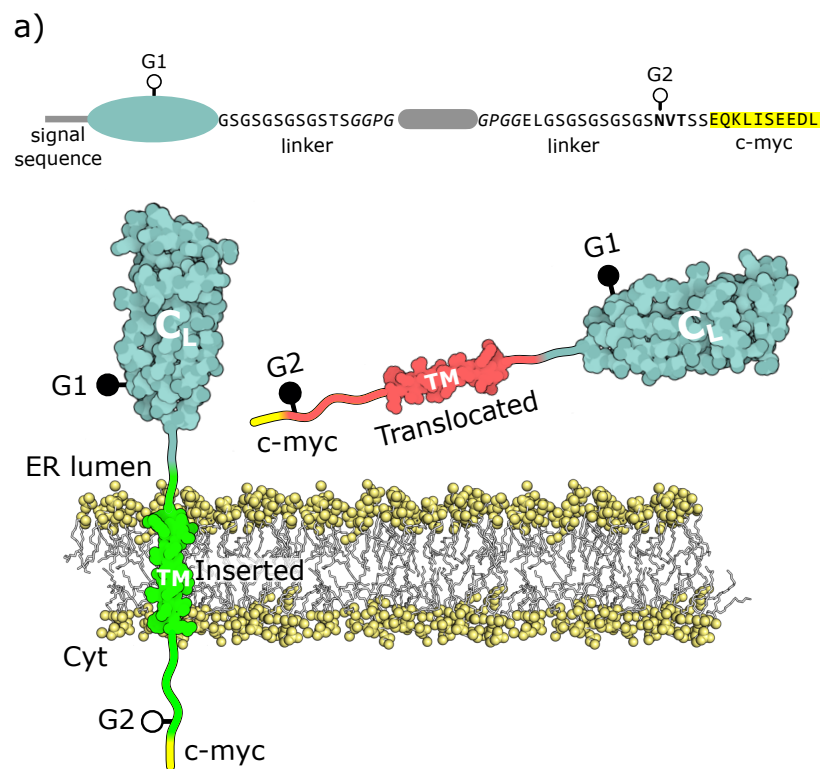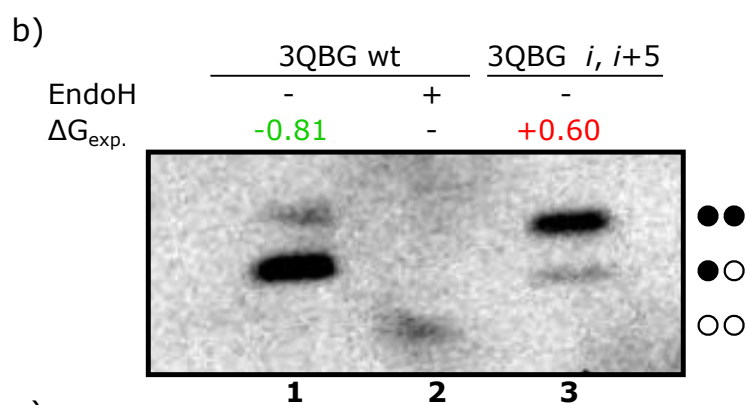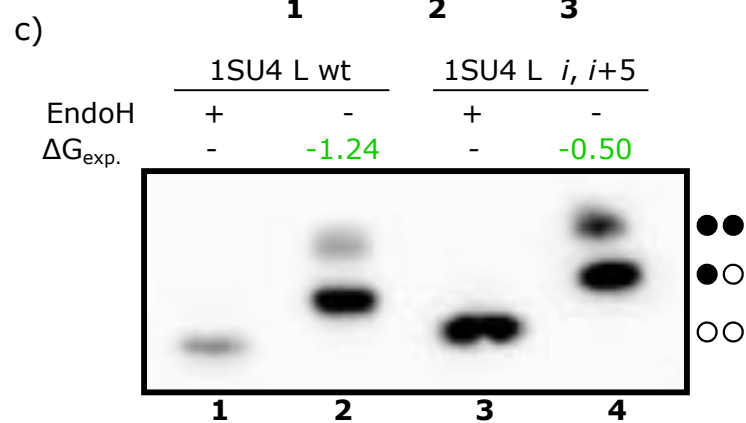



Figure S1

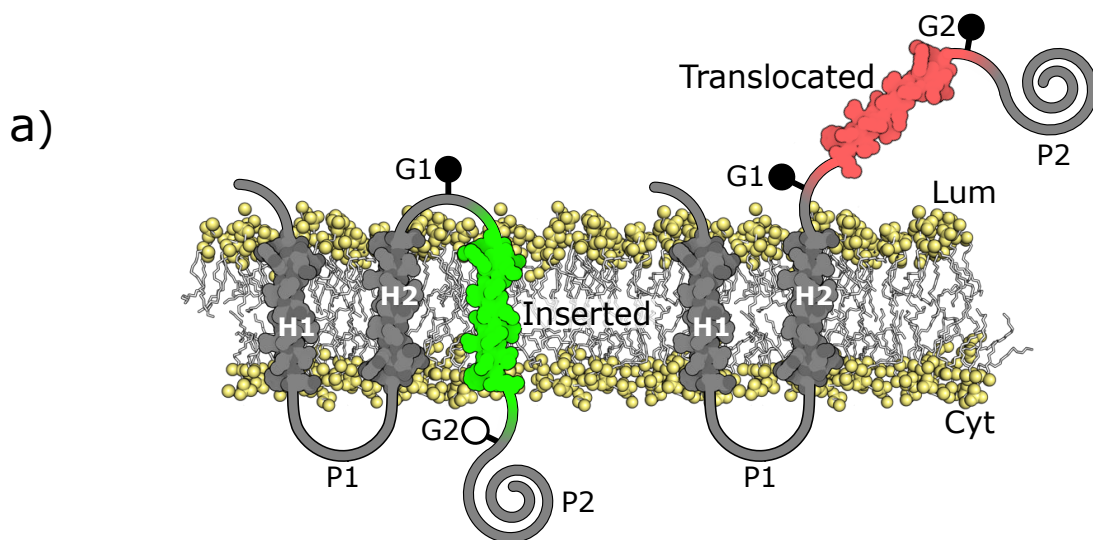

a)

| AA     | Gap | Sequence                                                        | $\Delta G_{\text{pred.}}$ | $\Delta G_{\text{exp.}}$ |
|--------|-----|-----------------------------------------------------------------|---------------------------|--------------------------|
| L5/A14 | -   | AAAA <sup>8</sup> LALAA <sup>12</sup> LAA <sup>12</sup> LALAAAA | -1.00                     | -1.17 ± 0.12             |
| K      | -   | AAAA <sup>8</sup> LAL <sup>12</sup> KALAA <sup>12</sup> LALAAAA | 1.00                      | 0.31 ± 0.08              |
| D      | -   | AAAA <sup>8</sup> LALAA <sup>12</sup> LADLALAAAA                | 0.98                      | 0.57 ± 0.08              |
| KD     | 3   | AAAA <sup>8</sup> LALAK <sup>12</sup> LADLALAAAA                | 2.97                      | 0.69 ± 0.03              |
| KD     | 4   | AAAA <sup>8</sup> LAL <sup>12</sup> KAAADLALAAAA                | 2.93                      | 0.58 ± 0.05              |
| KD     | 5   | AAAA <sup>8</sup> LAK <sup>12</sup> LAAADLALAAAA                | 2.14                      | 0.88 ± 0.04              |

b)

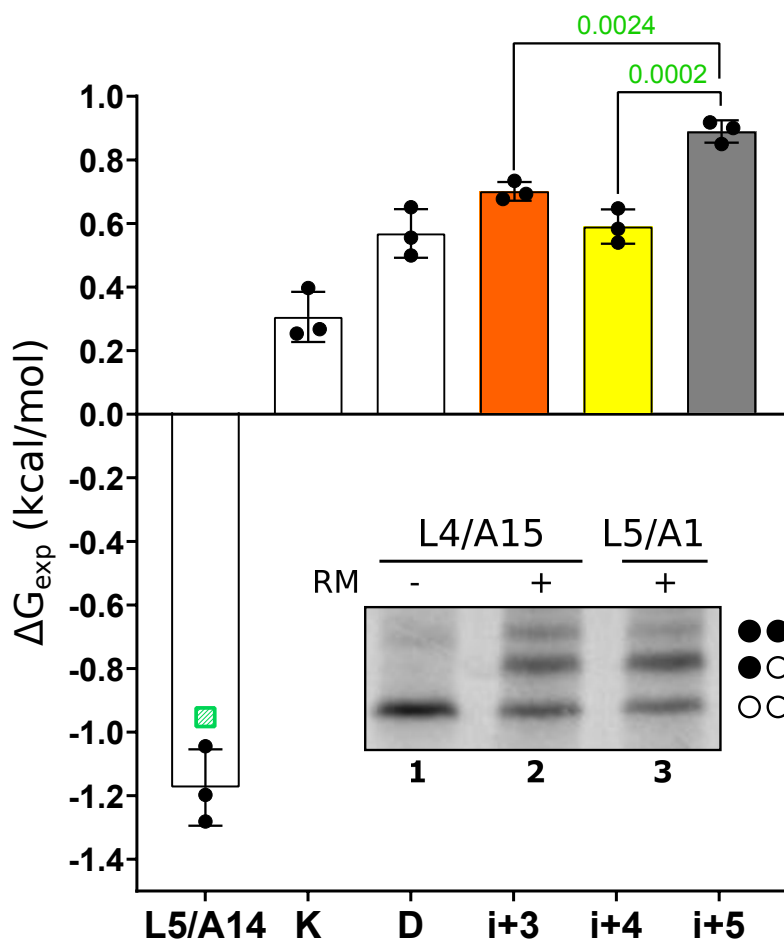

Figure S2

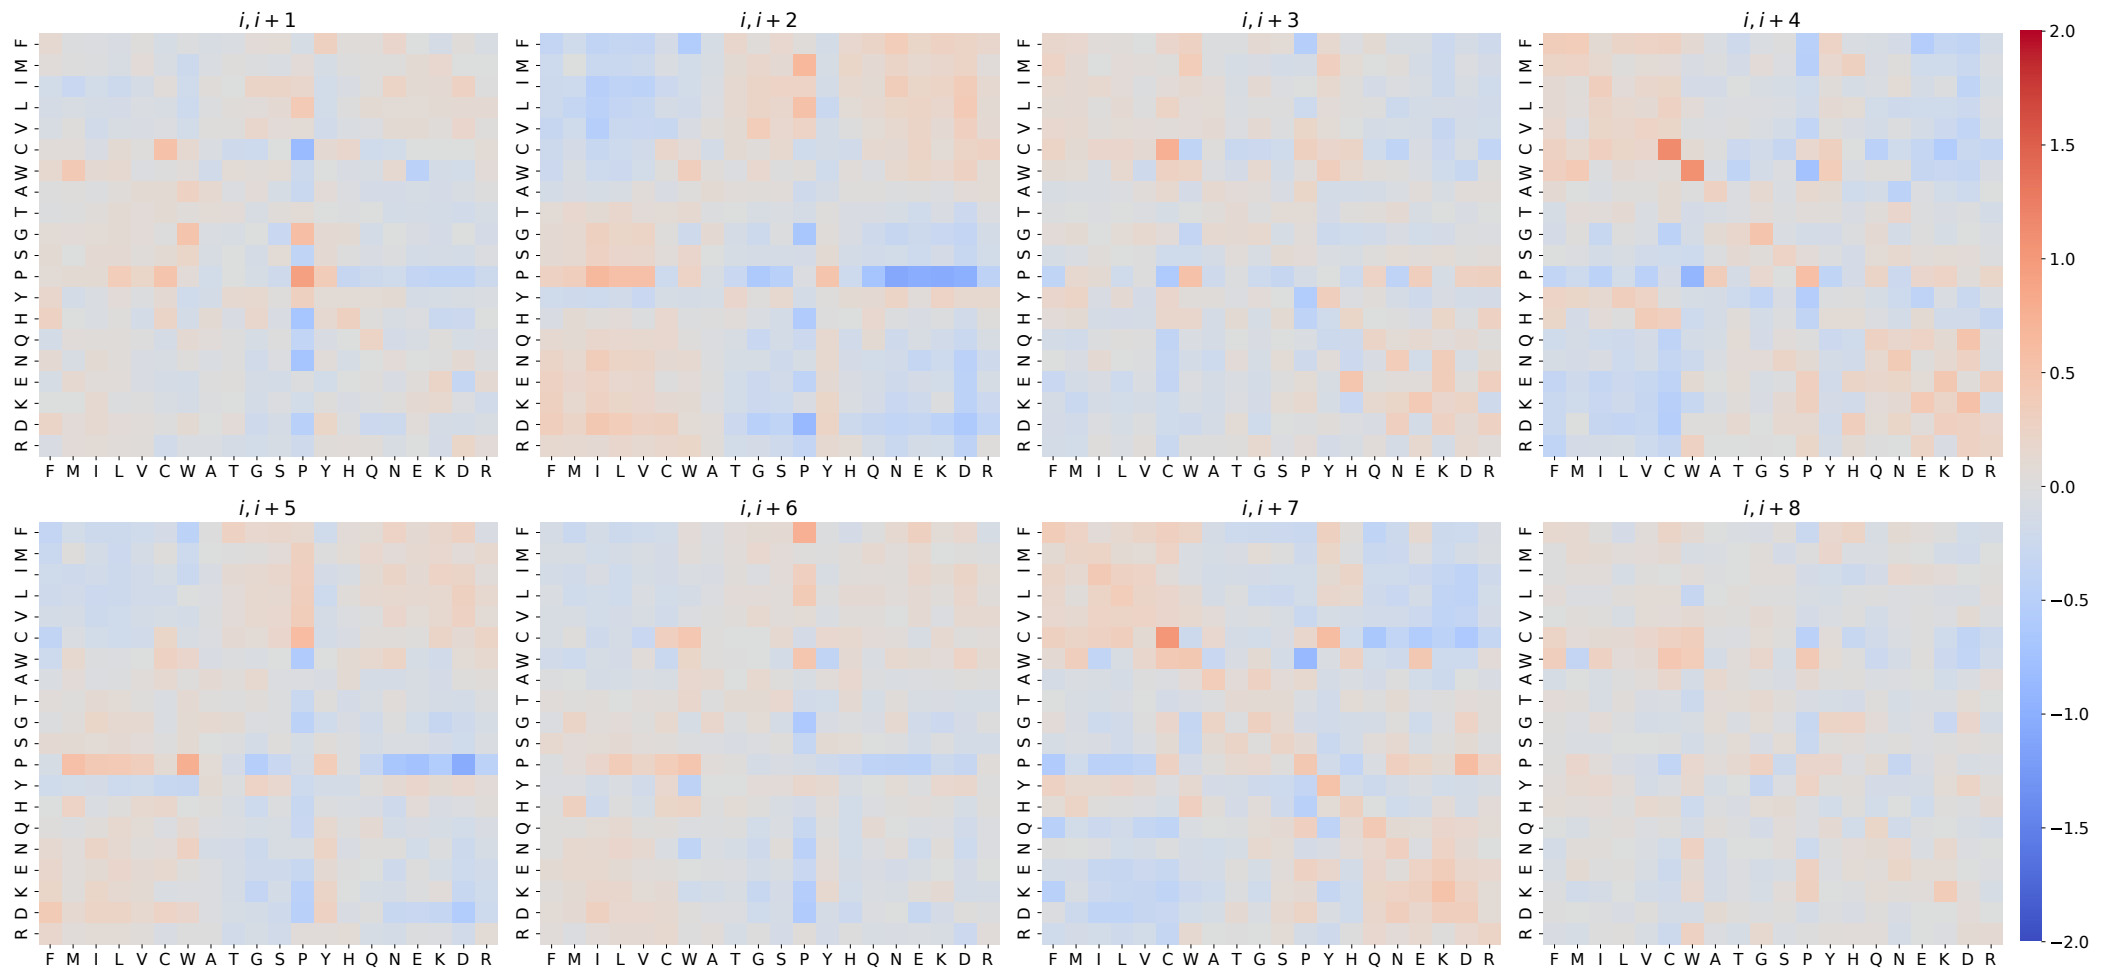

Figure S3

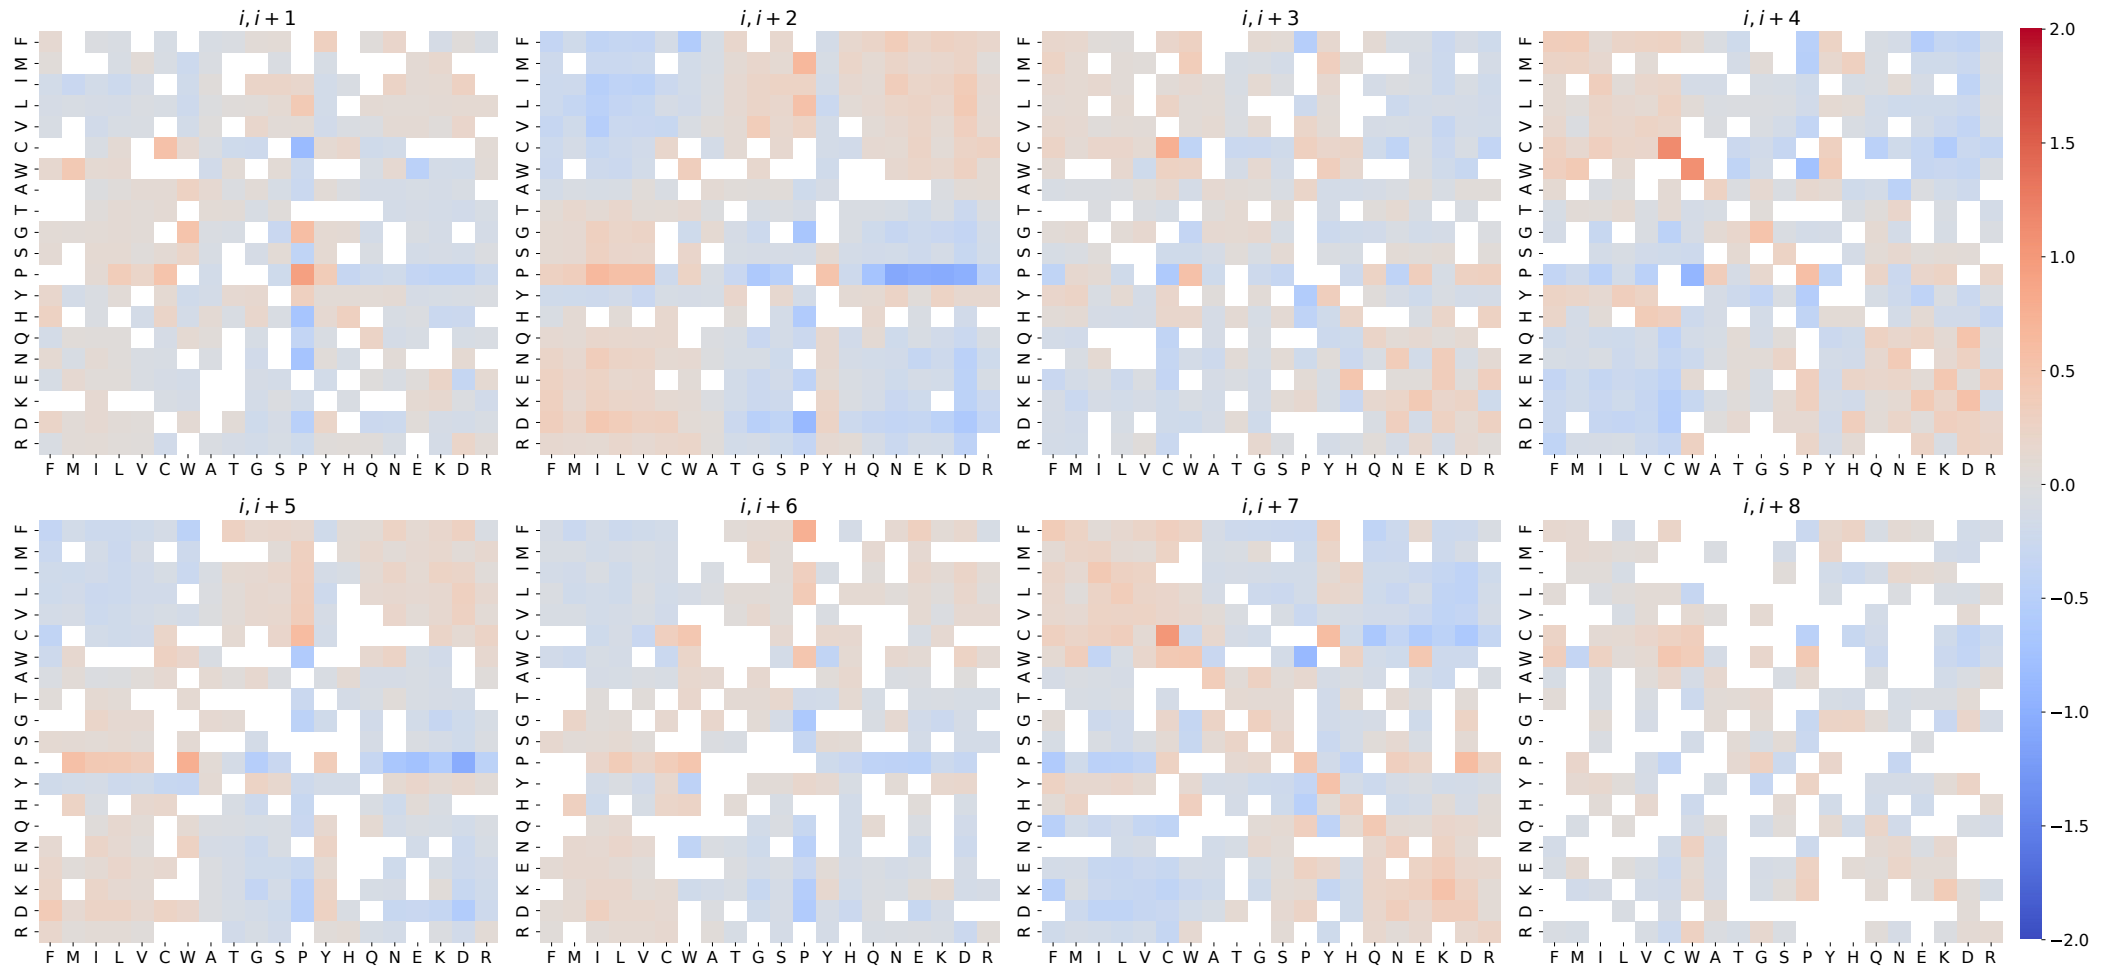

Figure S4

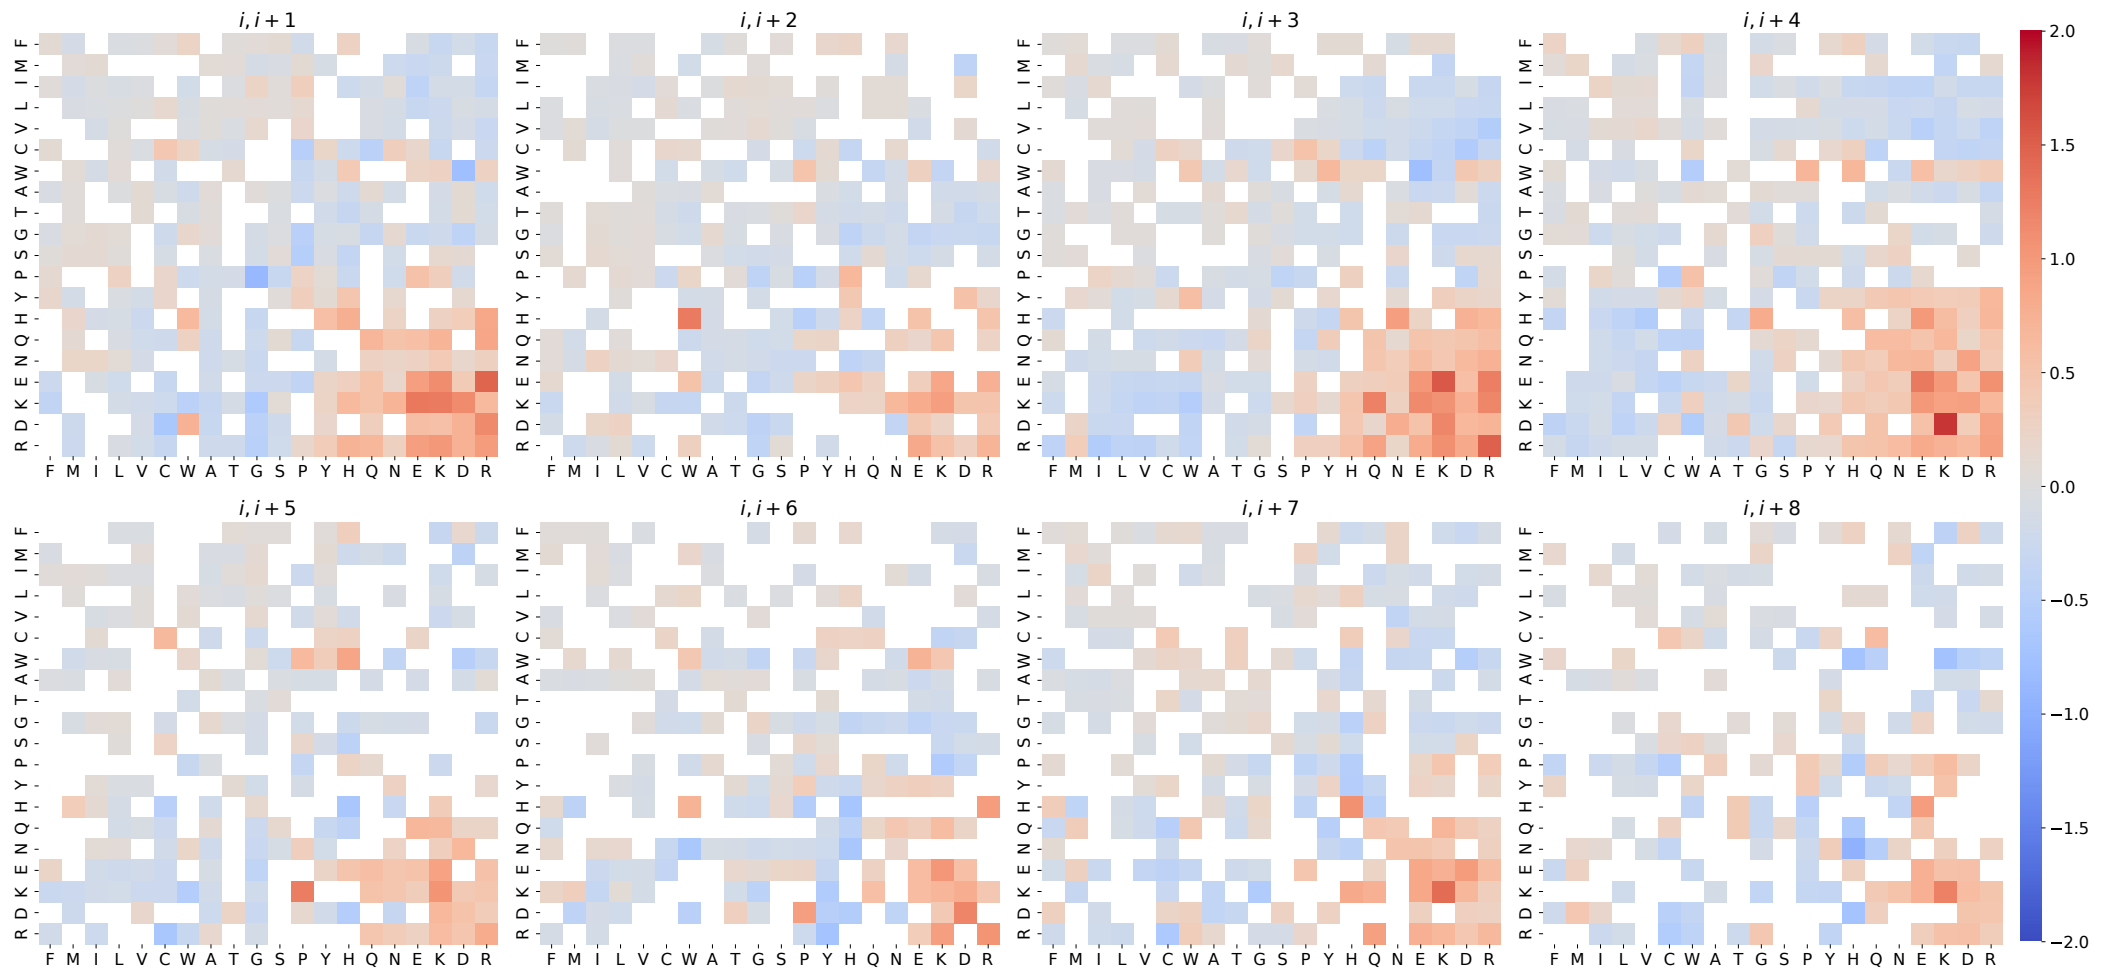

Figure S5

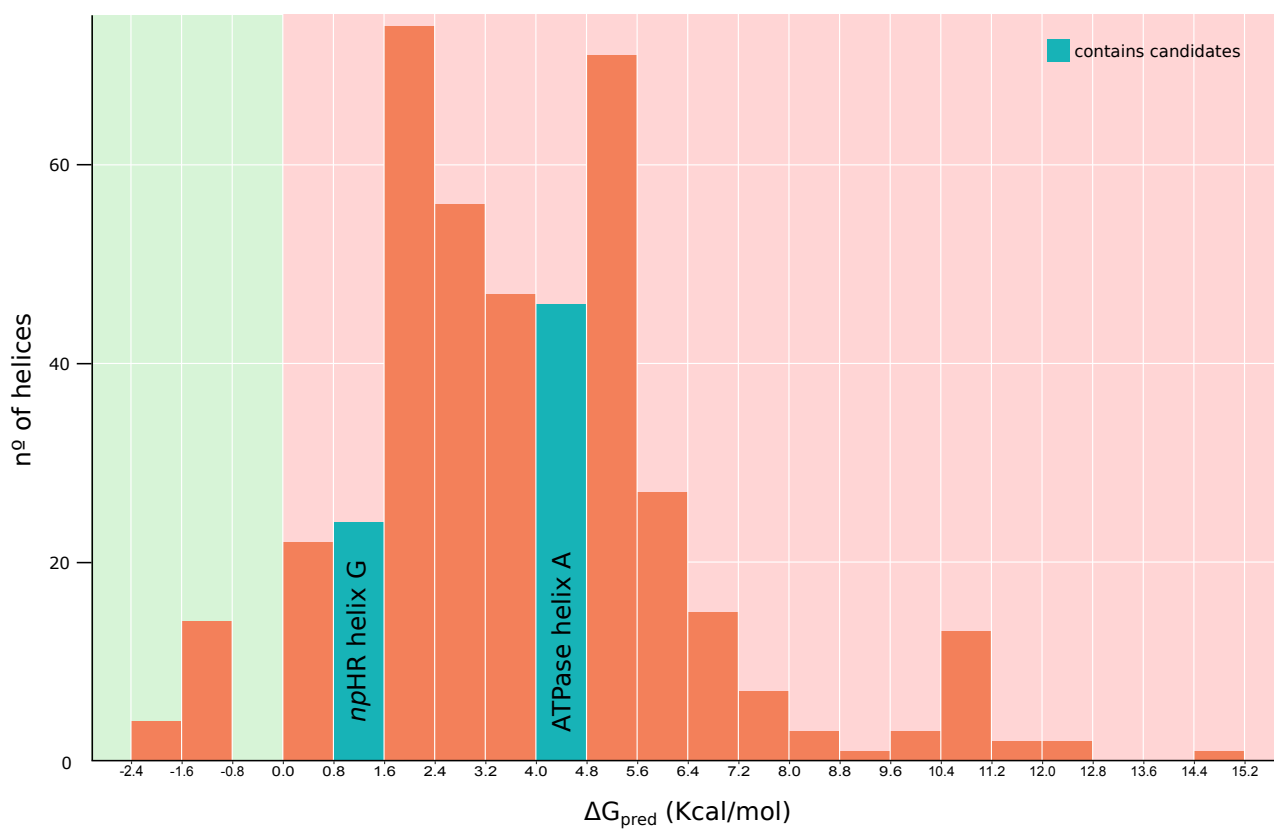

Figure S6

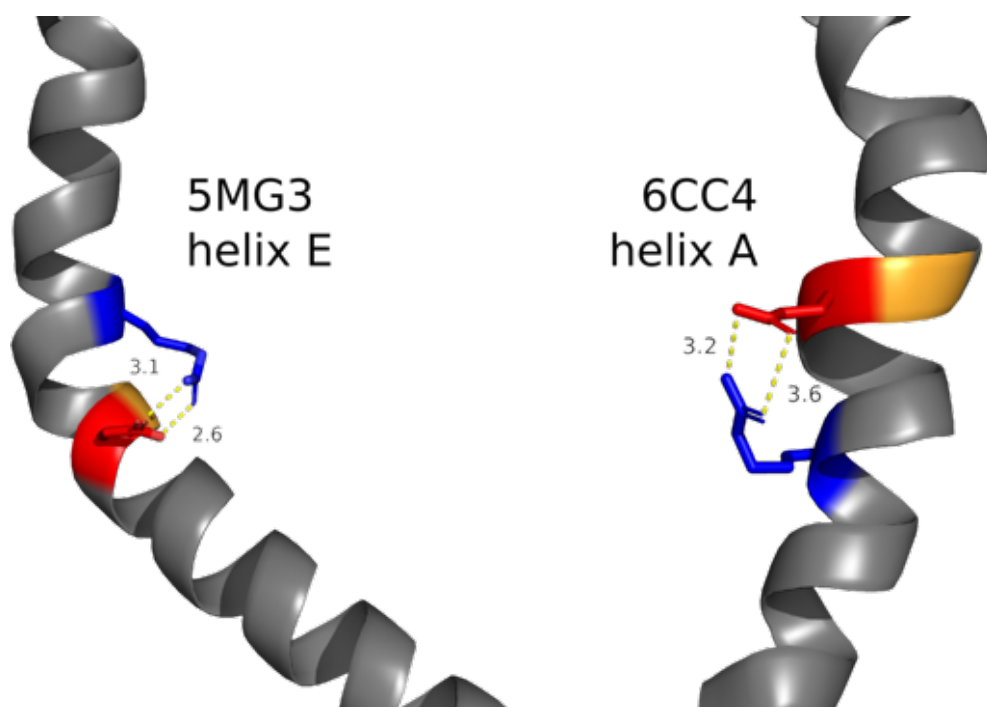

Source: https://www.biorxiv.org/content/10.1101/2021.02.24.432724v3.full.pdf
